# Supplementary material for: Modern Senicide in the Face of a Pandemic: An Examination of Public Discourse and Sentiment About Older Adults and COVID-19 Using Machine Learning
Source: Oxford University Press journal article supplement (doi:10.1093/geronb/gbaa128), 2020-08-06
Supplement: gbaa128_suppl_supplemental_files.docx [file gbaa128_suppl_supplemental_files.docx]

**
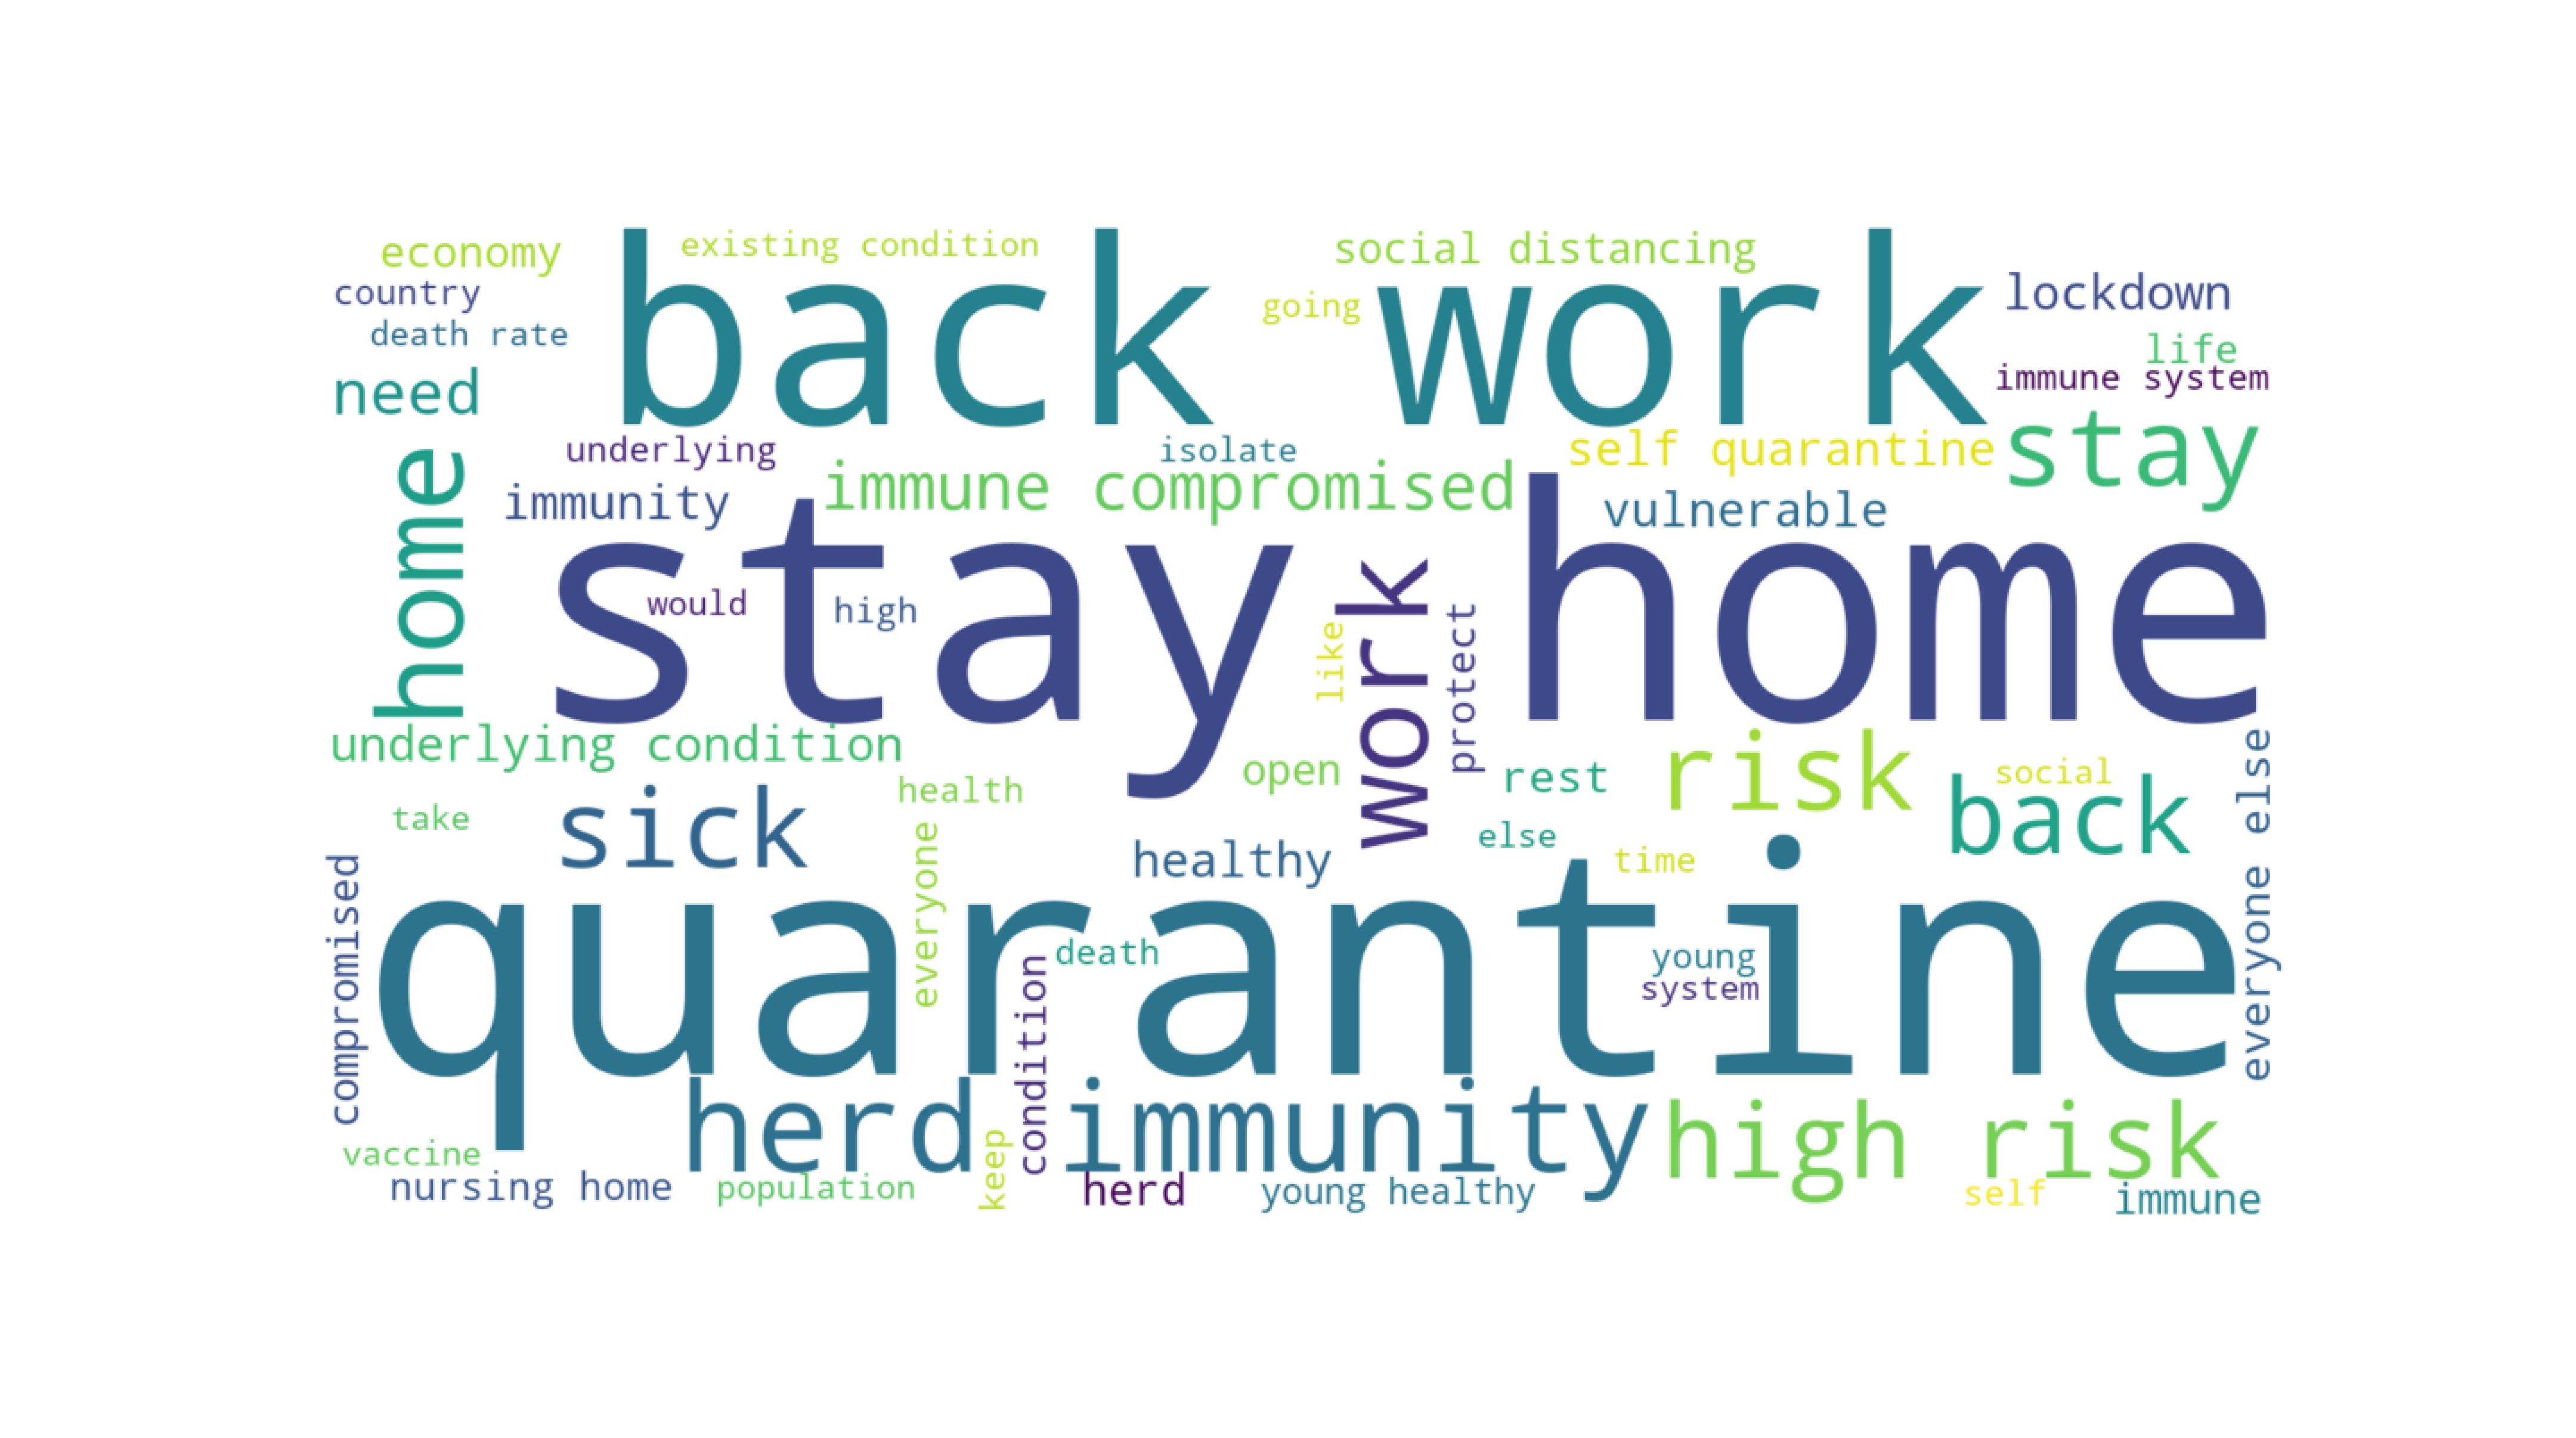
Figure 1S.** Word cloud of top words in tweets that explicitly supported the idea of just isolating older adults and other high-risk groups (n=3795). Terms related to older adults and COVID-19 were removed from the word cloud.

**
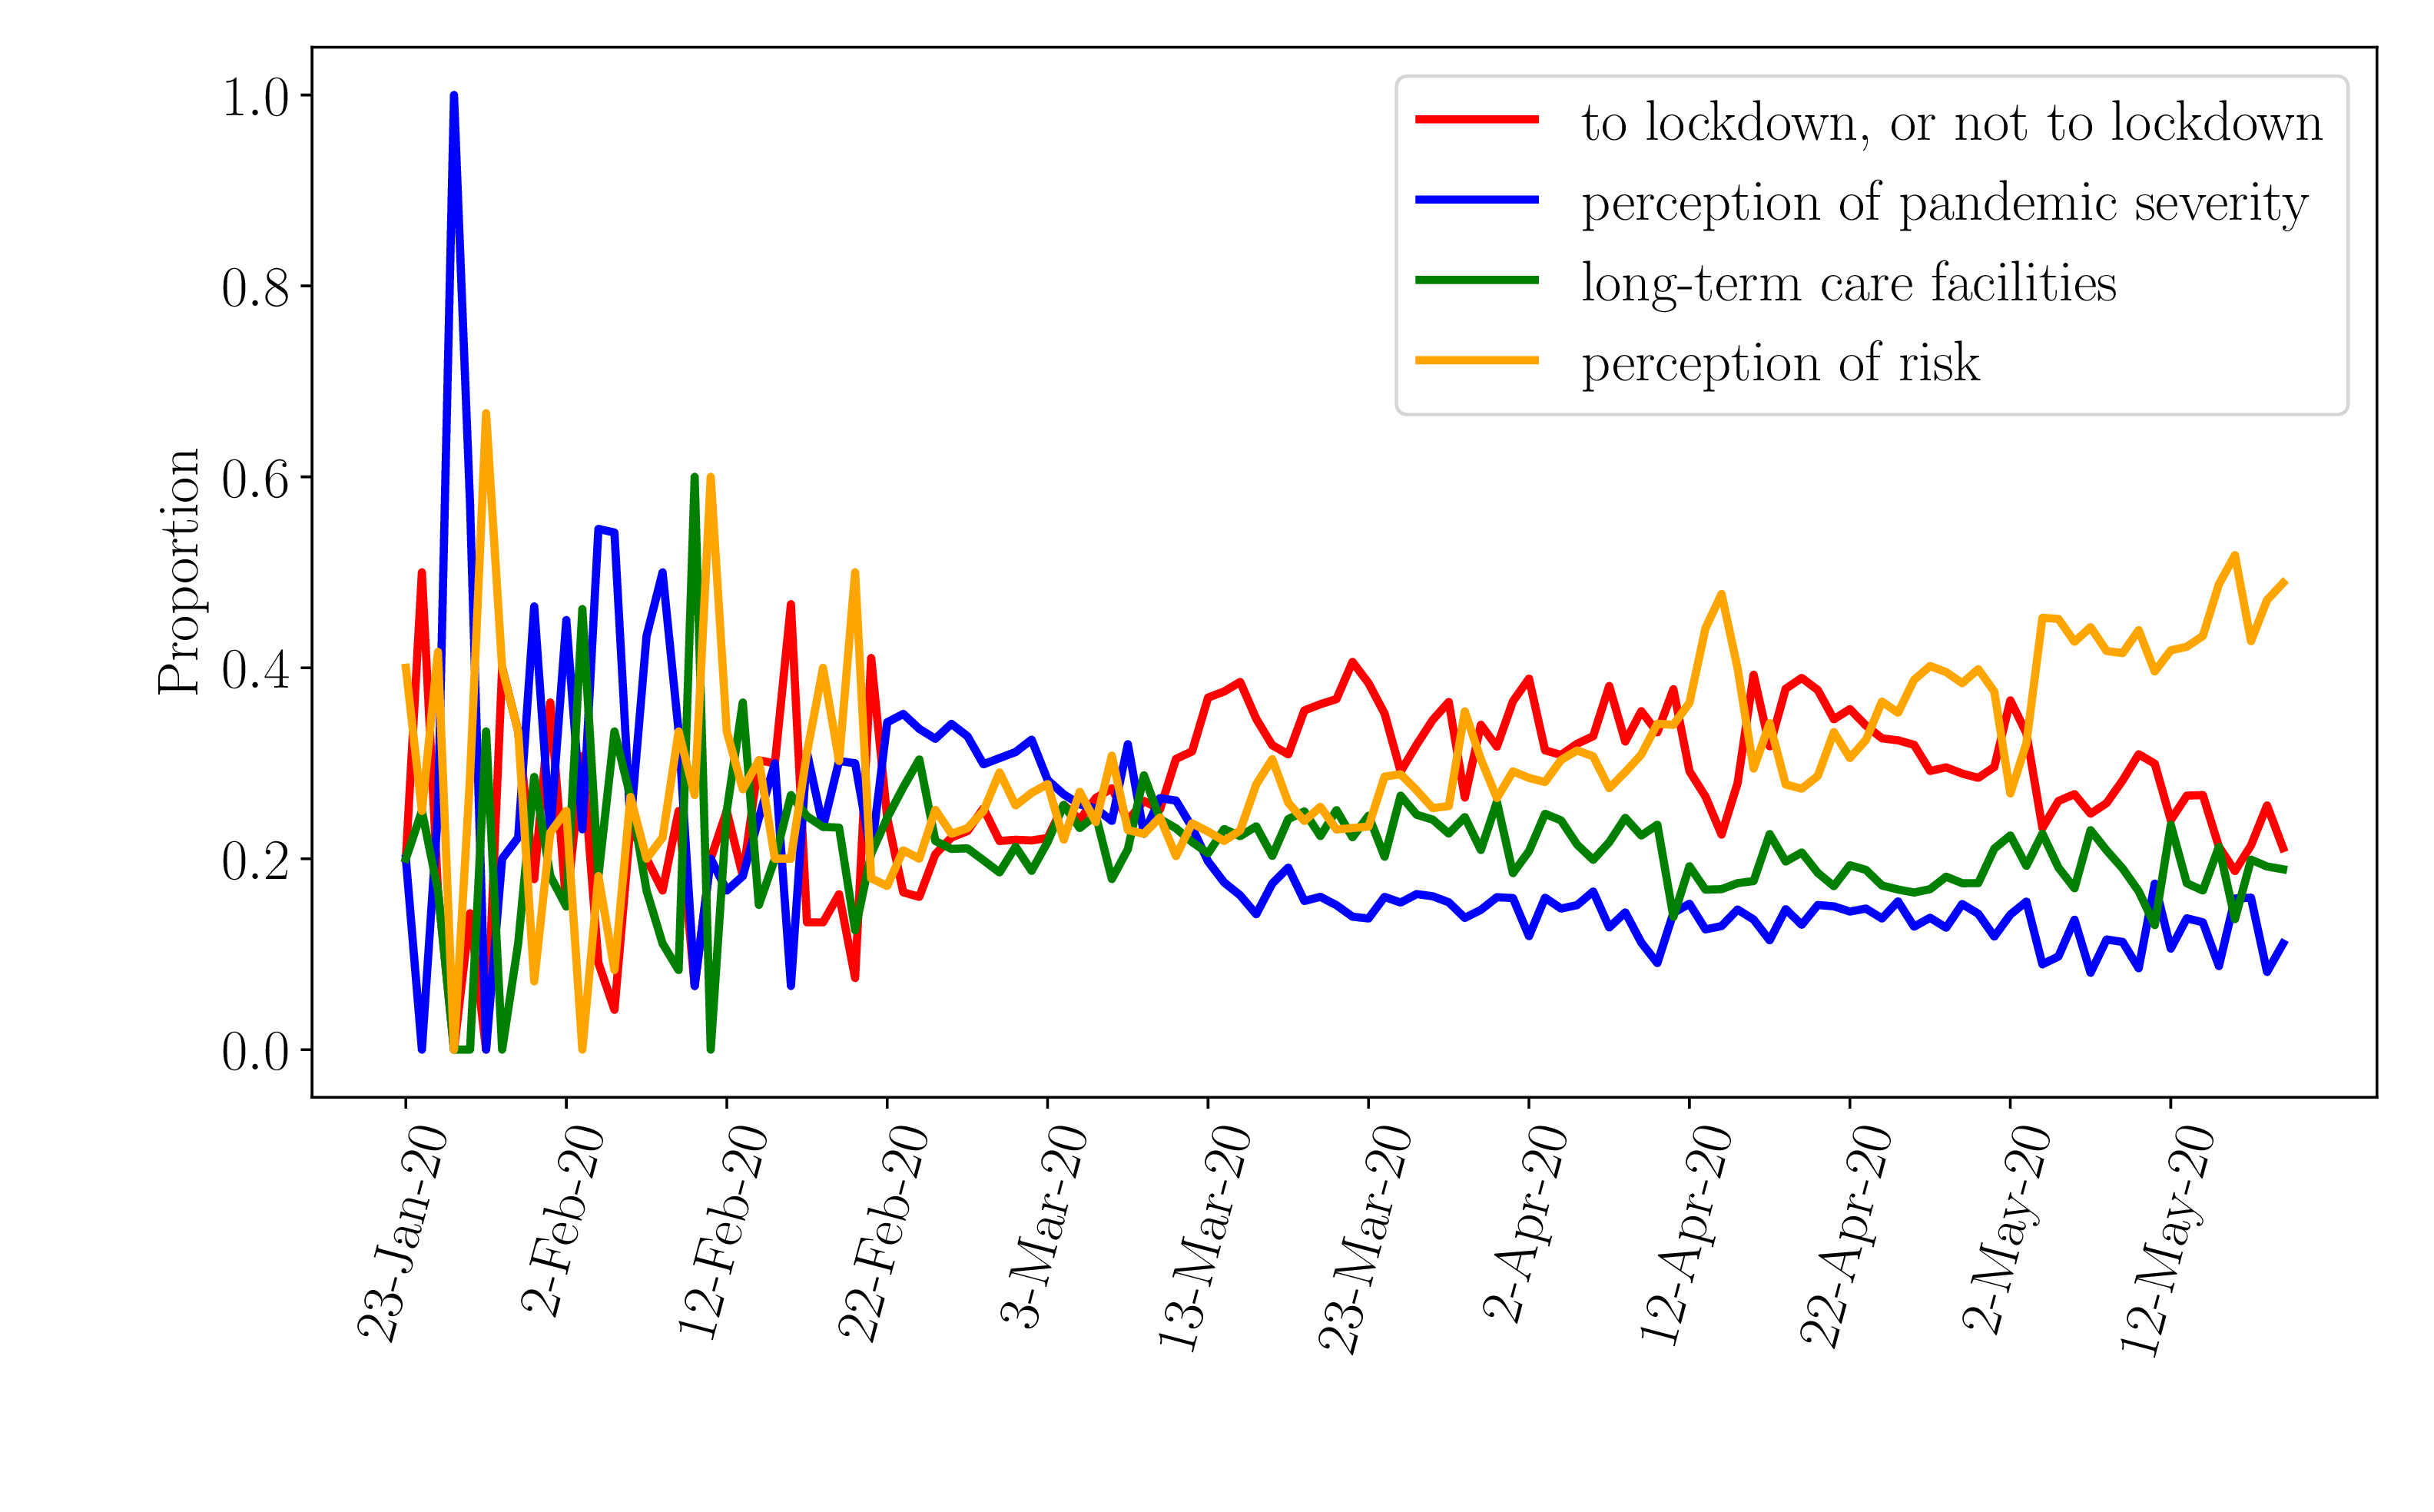
Figure 2S.** Changes in the prevalence of tweet content of themes within “personal opinions”

related to older adults and COVID-19 from January 23rd to May 20th, 2020. The denominator was the total number of tweets within “personal opinions” for the day. The bivariate Granger causality test results linking the time series in Figure 3S and those in Figure 4S are shown in the table below.

|  | | Time series Figure 3S “personal opinions” tweets (“y”) | | | |
| --- | --- | --- | --- | --- | --- |
| Time series Figure  4S  “informative” tweets  (“x”) |  | Long-term care facilities | To lock down or not to lock down | Pandemic severity | Perception of risk |
| At-risk population |  | 0.2042 | 0.1609 | **0.003948** |
| Pandemic updates |  | **0.0002** | 0.3509 | 0.3476 |
| Long-term care facilities | **0.0002** | **3e-5** | **0.0203** | **0.001678** |
| Basic needs |  | 0.07374 |  | 0.2548 |
| Mental health toll |  | 0.429 | 0.2303 | 0.1809 |

*Note.* P-values <·05 are in boldface. All tests selected order r=7 days to allow a week’s worth of past information to be used as predictors for y. A significant test indicates that past “informative” tweets in the given theme predicted “personal opinions” tweets in the given theme. Empty cells were not tested. These tests were exploratory; therefore, we did not adjust the alpha levels.

**
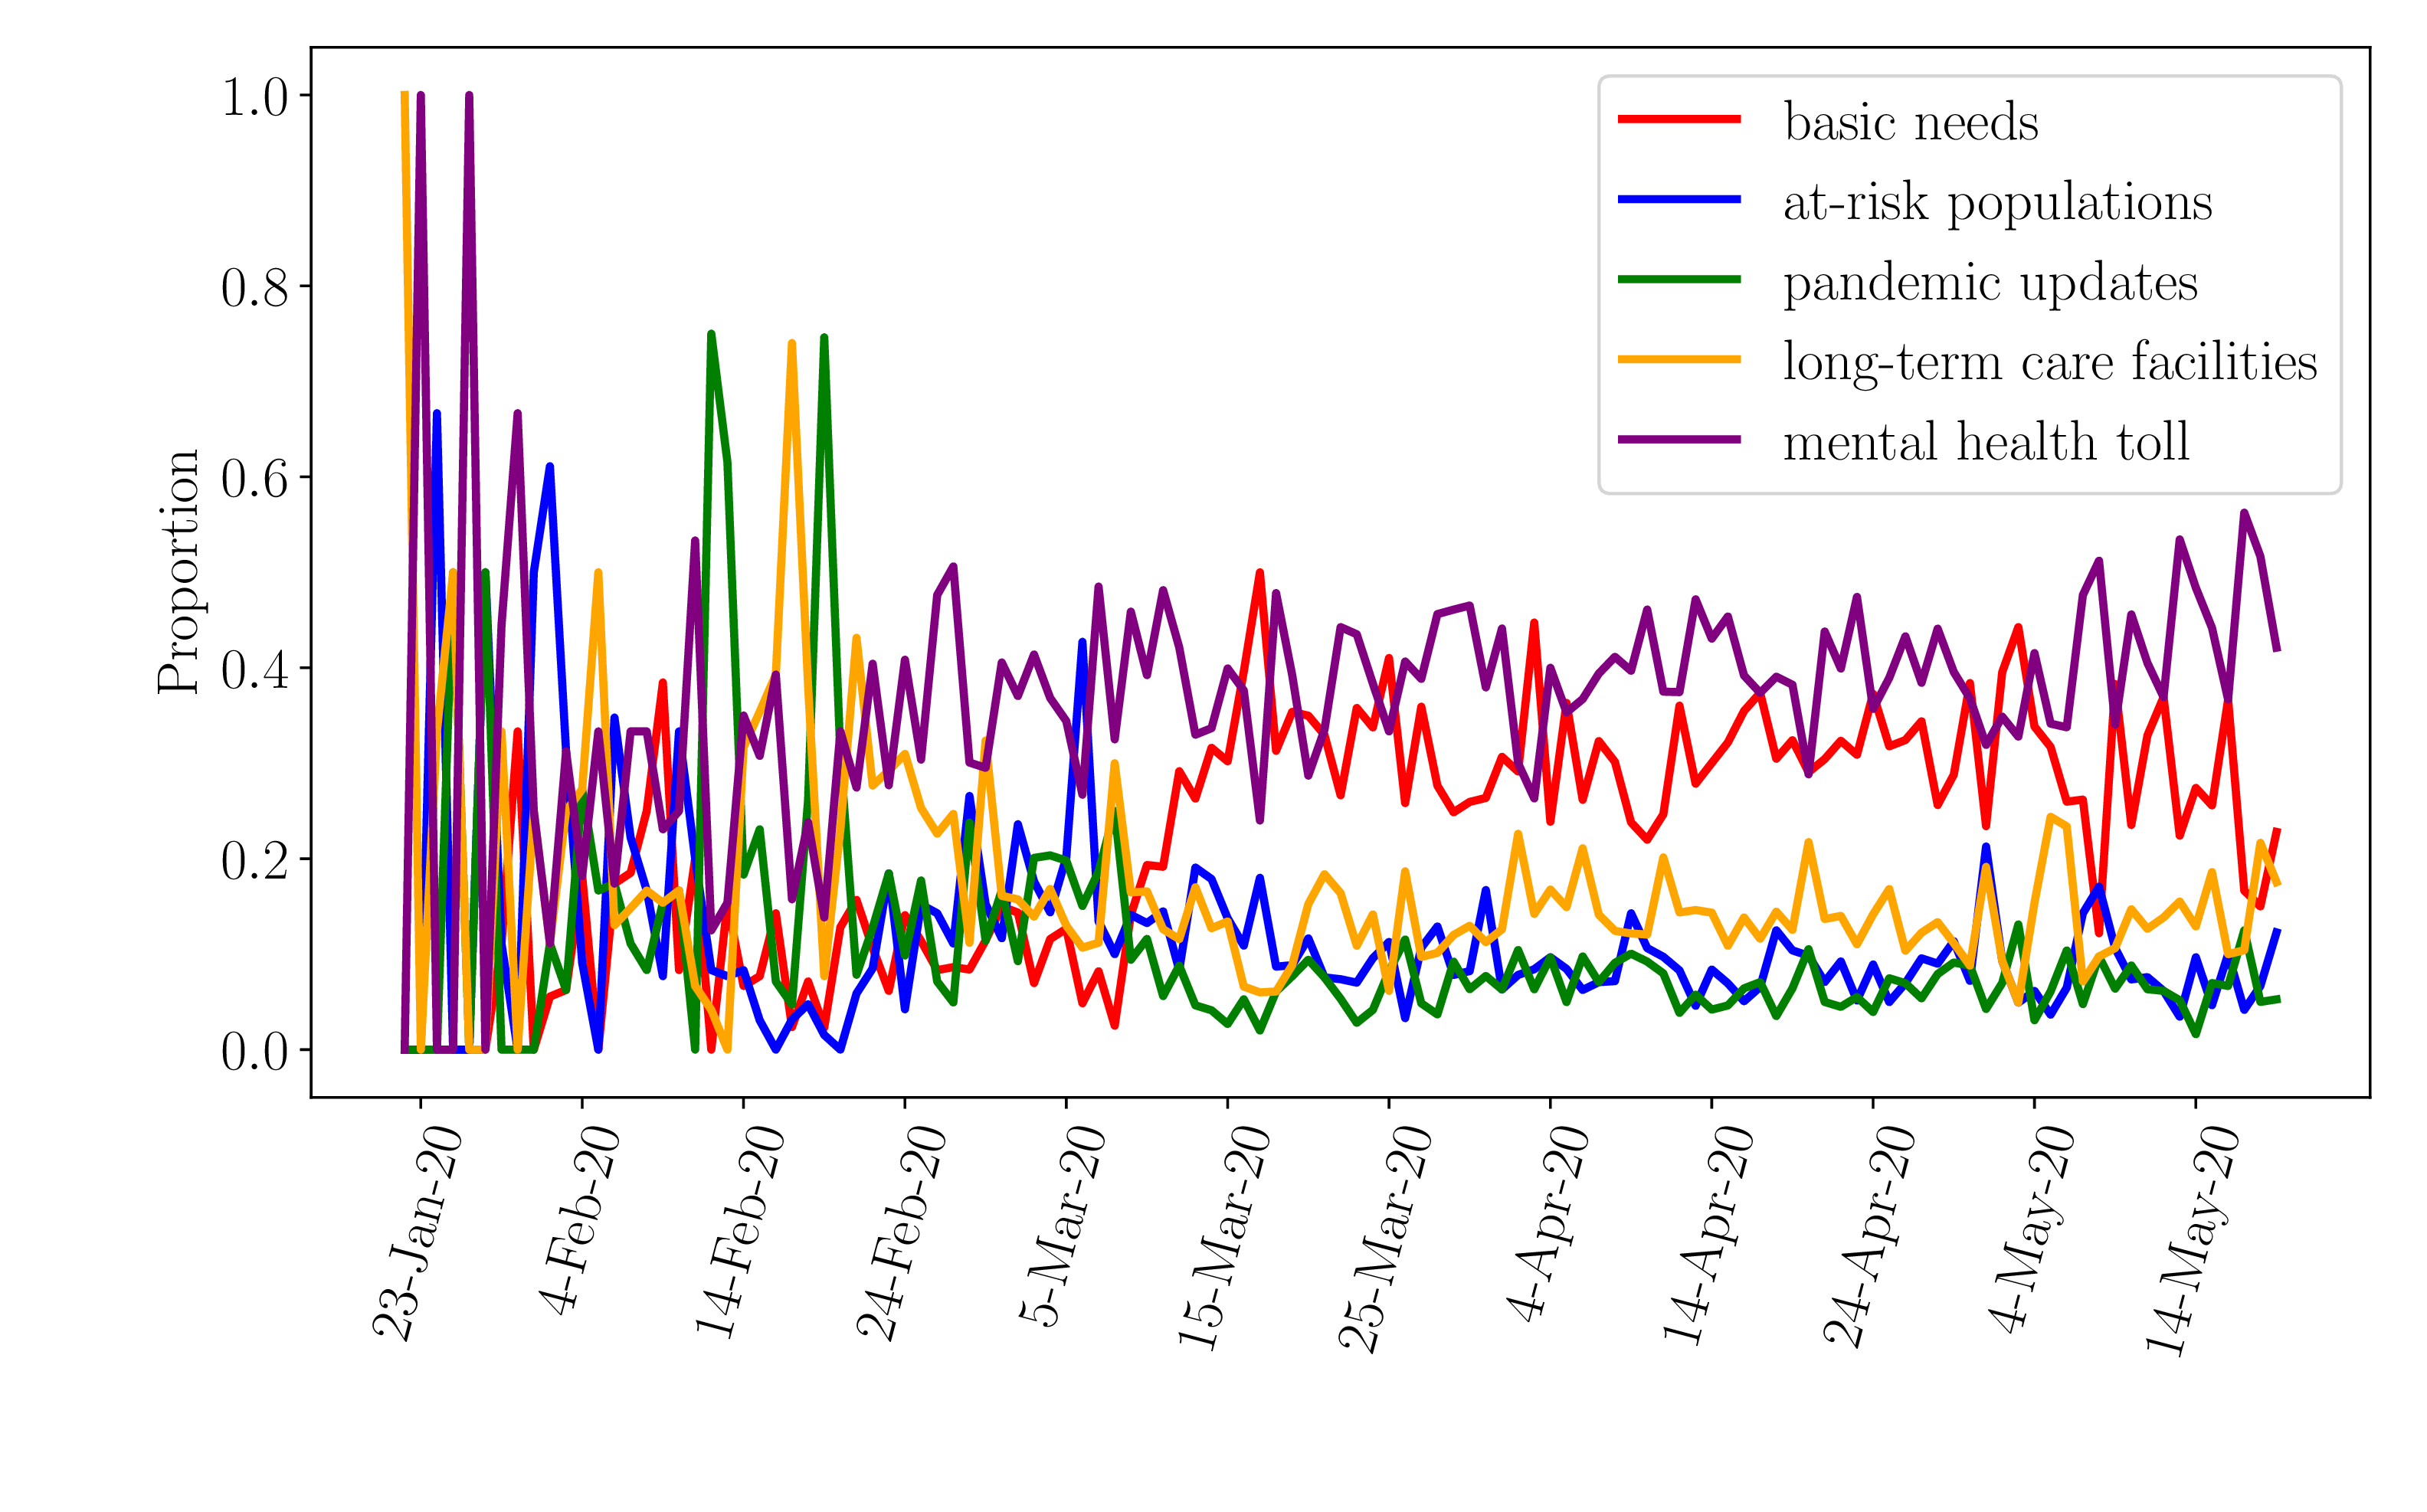
**

**Figure 3S.** Changes in the prevalence of tweet content of themes within “informative” tweets related to older adults and COVID-19 from January 23rd to May 20th, 2020. The denominator was the total number of tweets within “informative” tweets for the day.

**
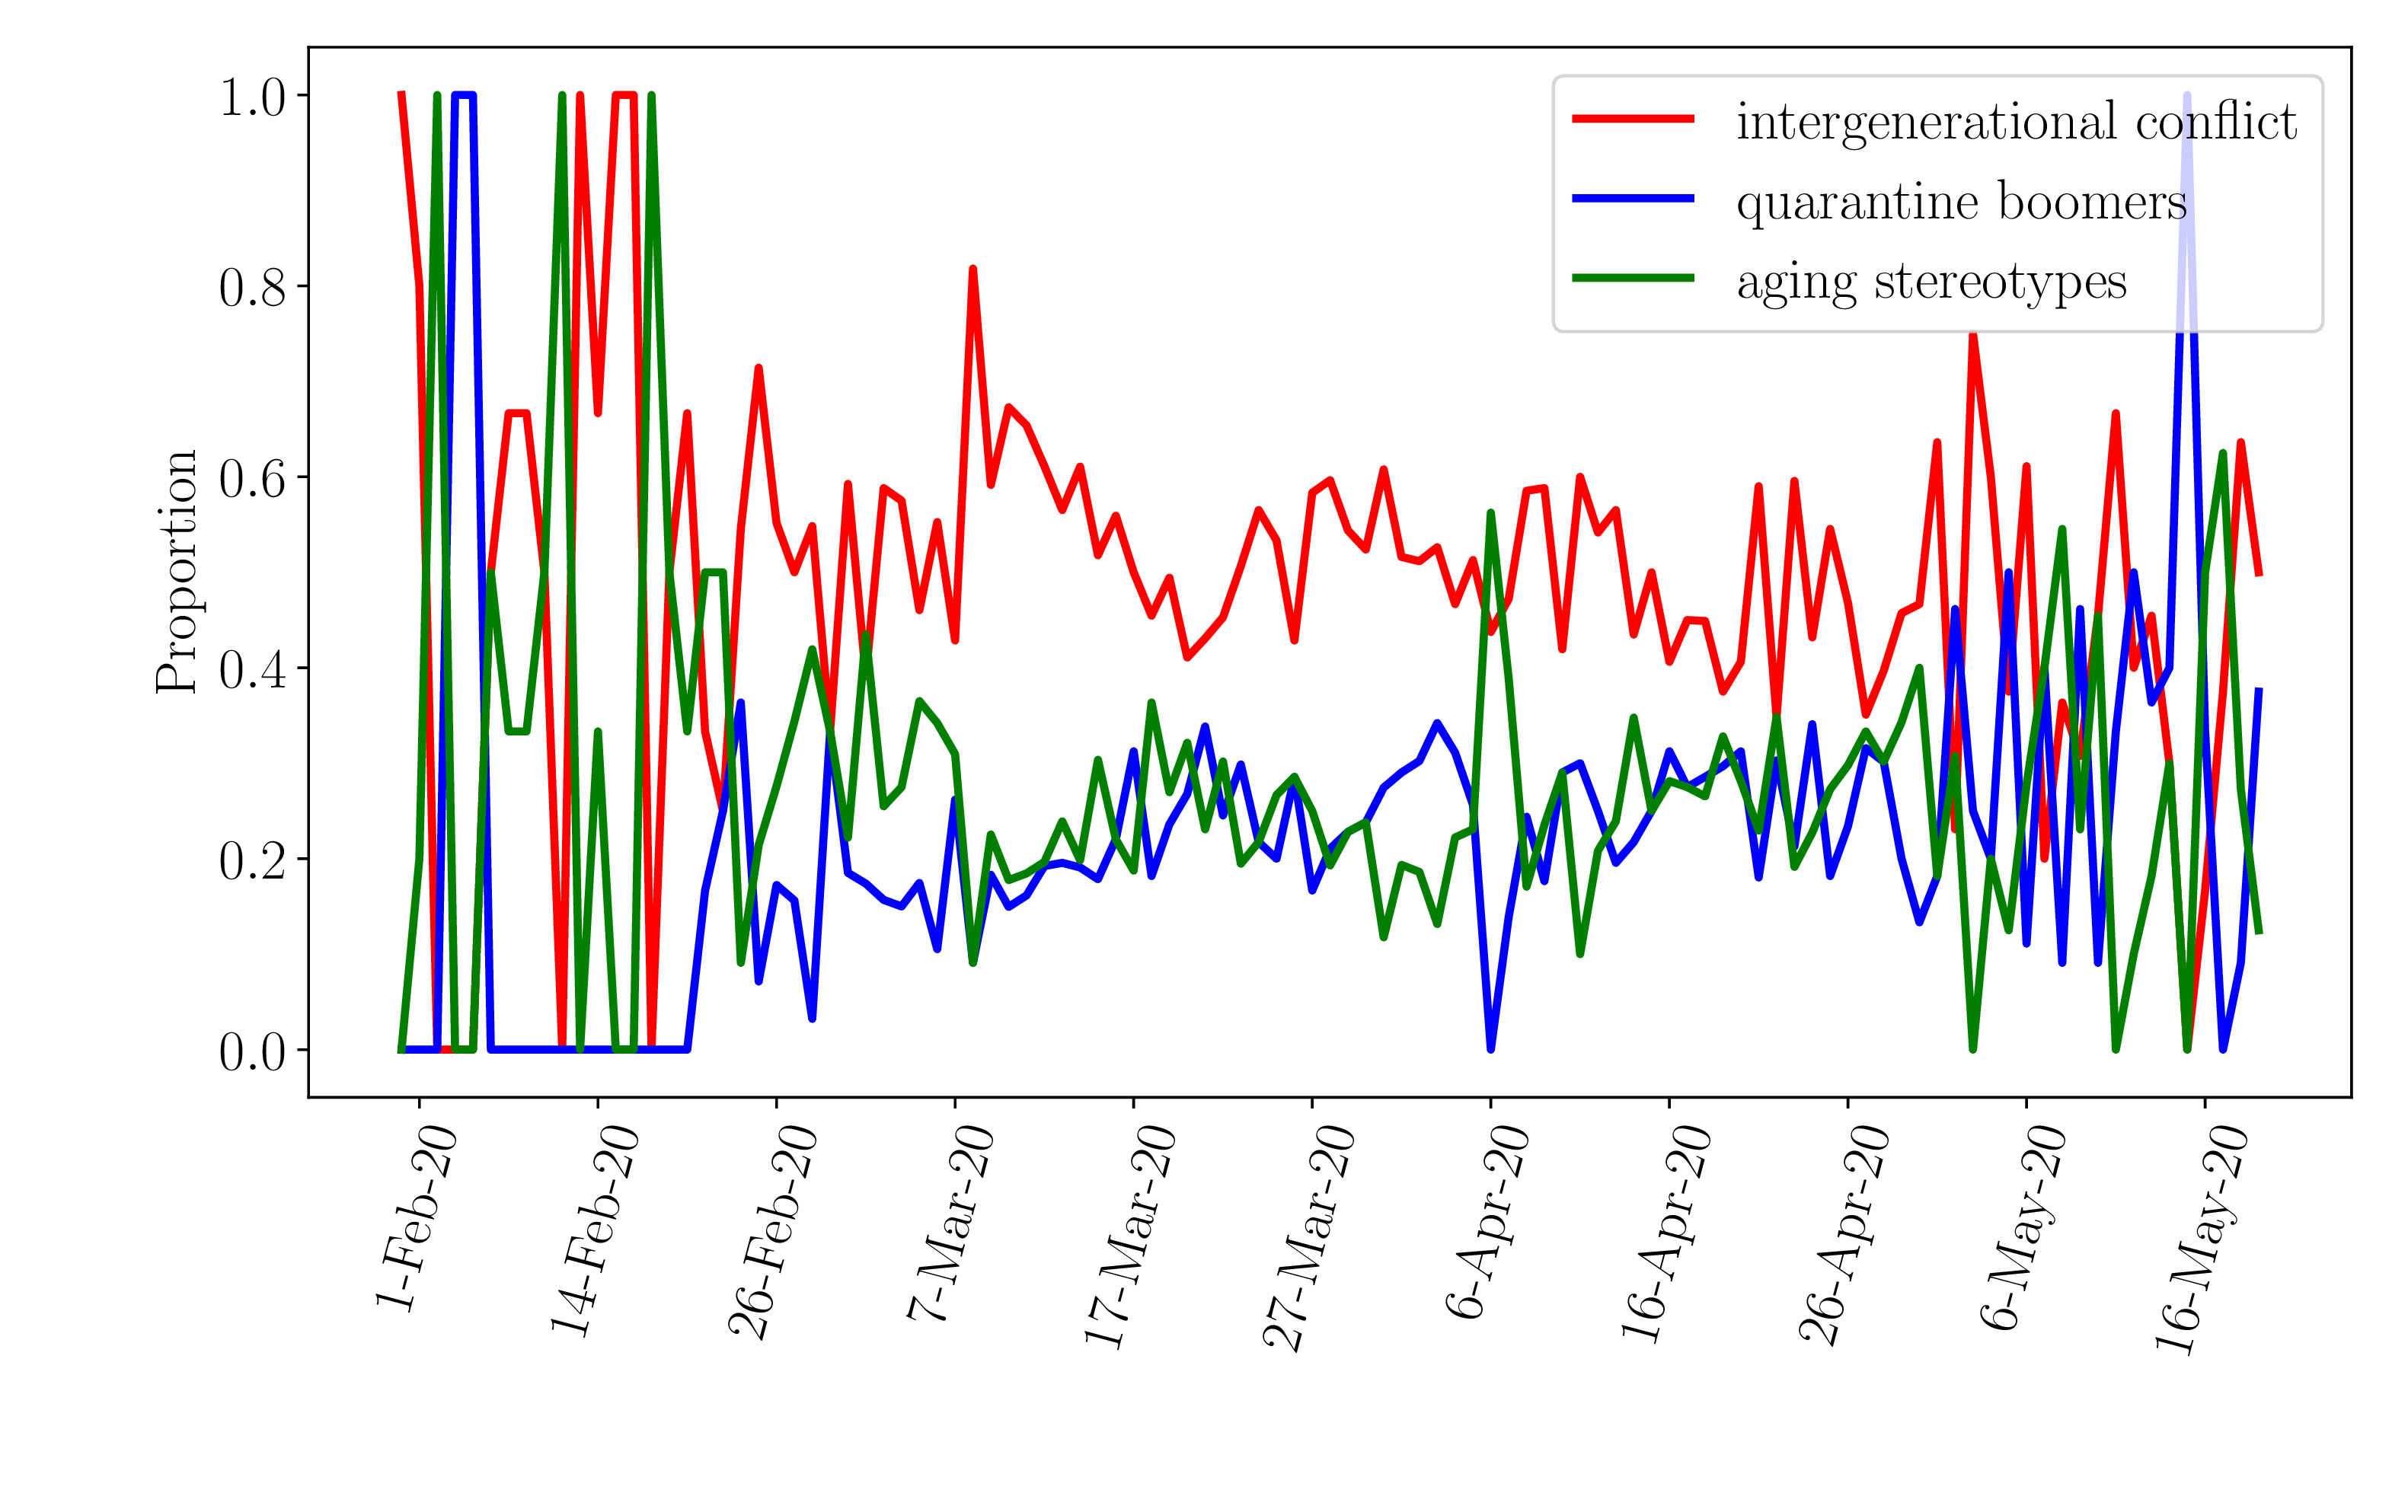
Figure 4S.** Changes in the prevalence of tweet content of themes within “jokes/ridicule” tweets related to older adults and COVID-19 from January 23rd to May 20th, 2020. The denominator was the total number of tweets within “jokes/ridicule” tweets for the day.

**
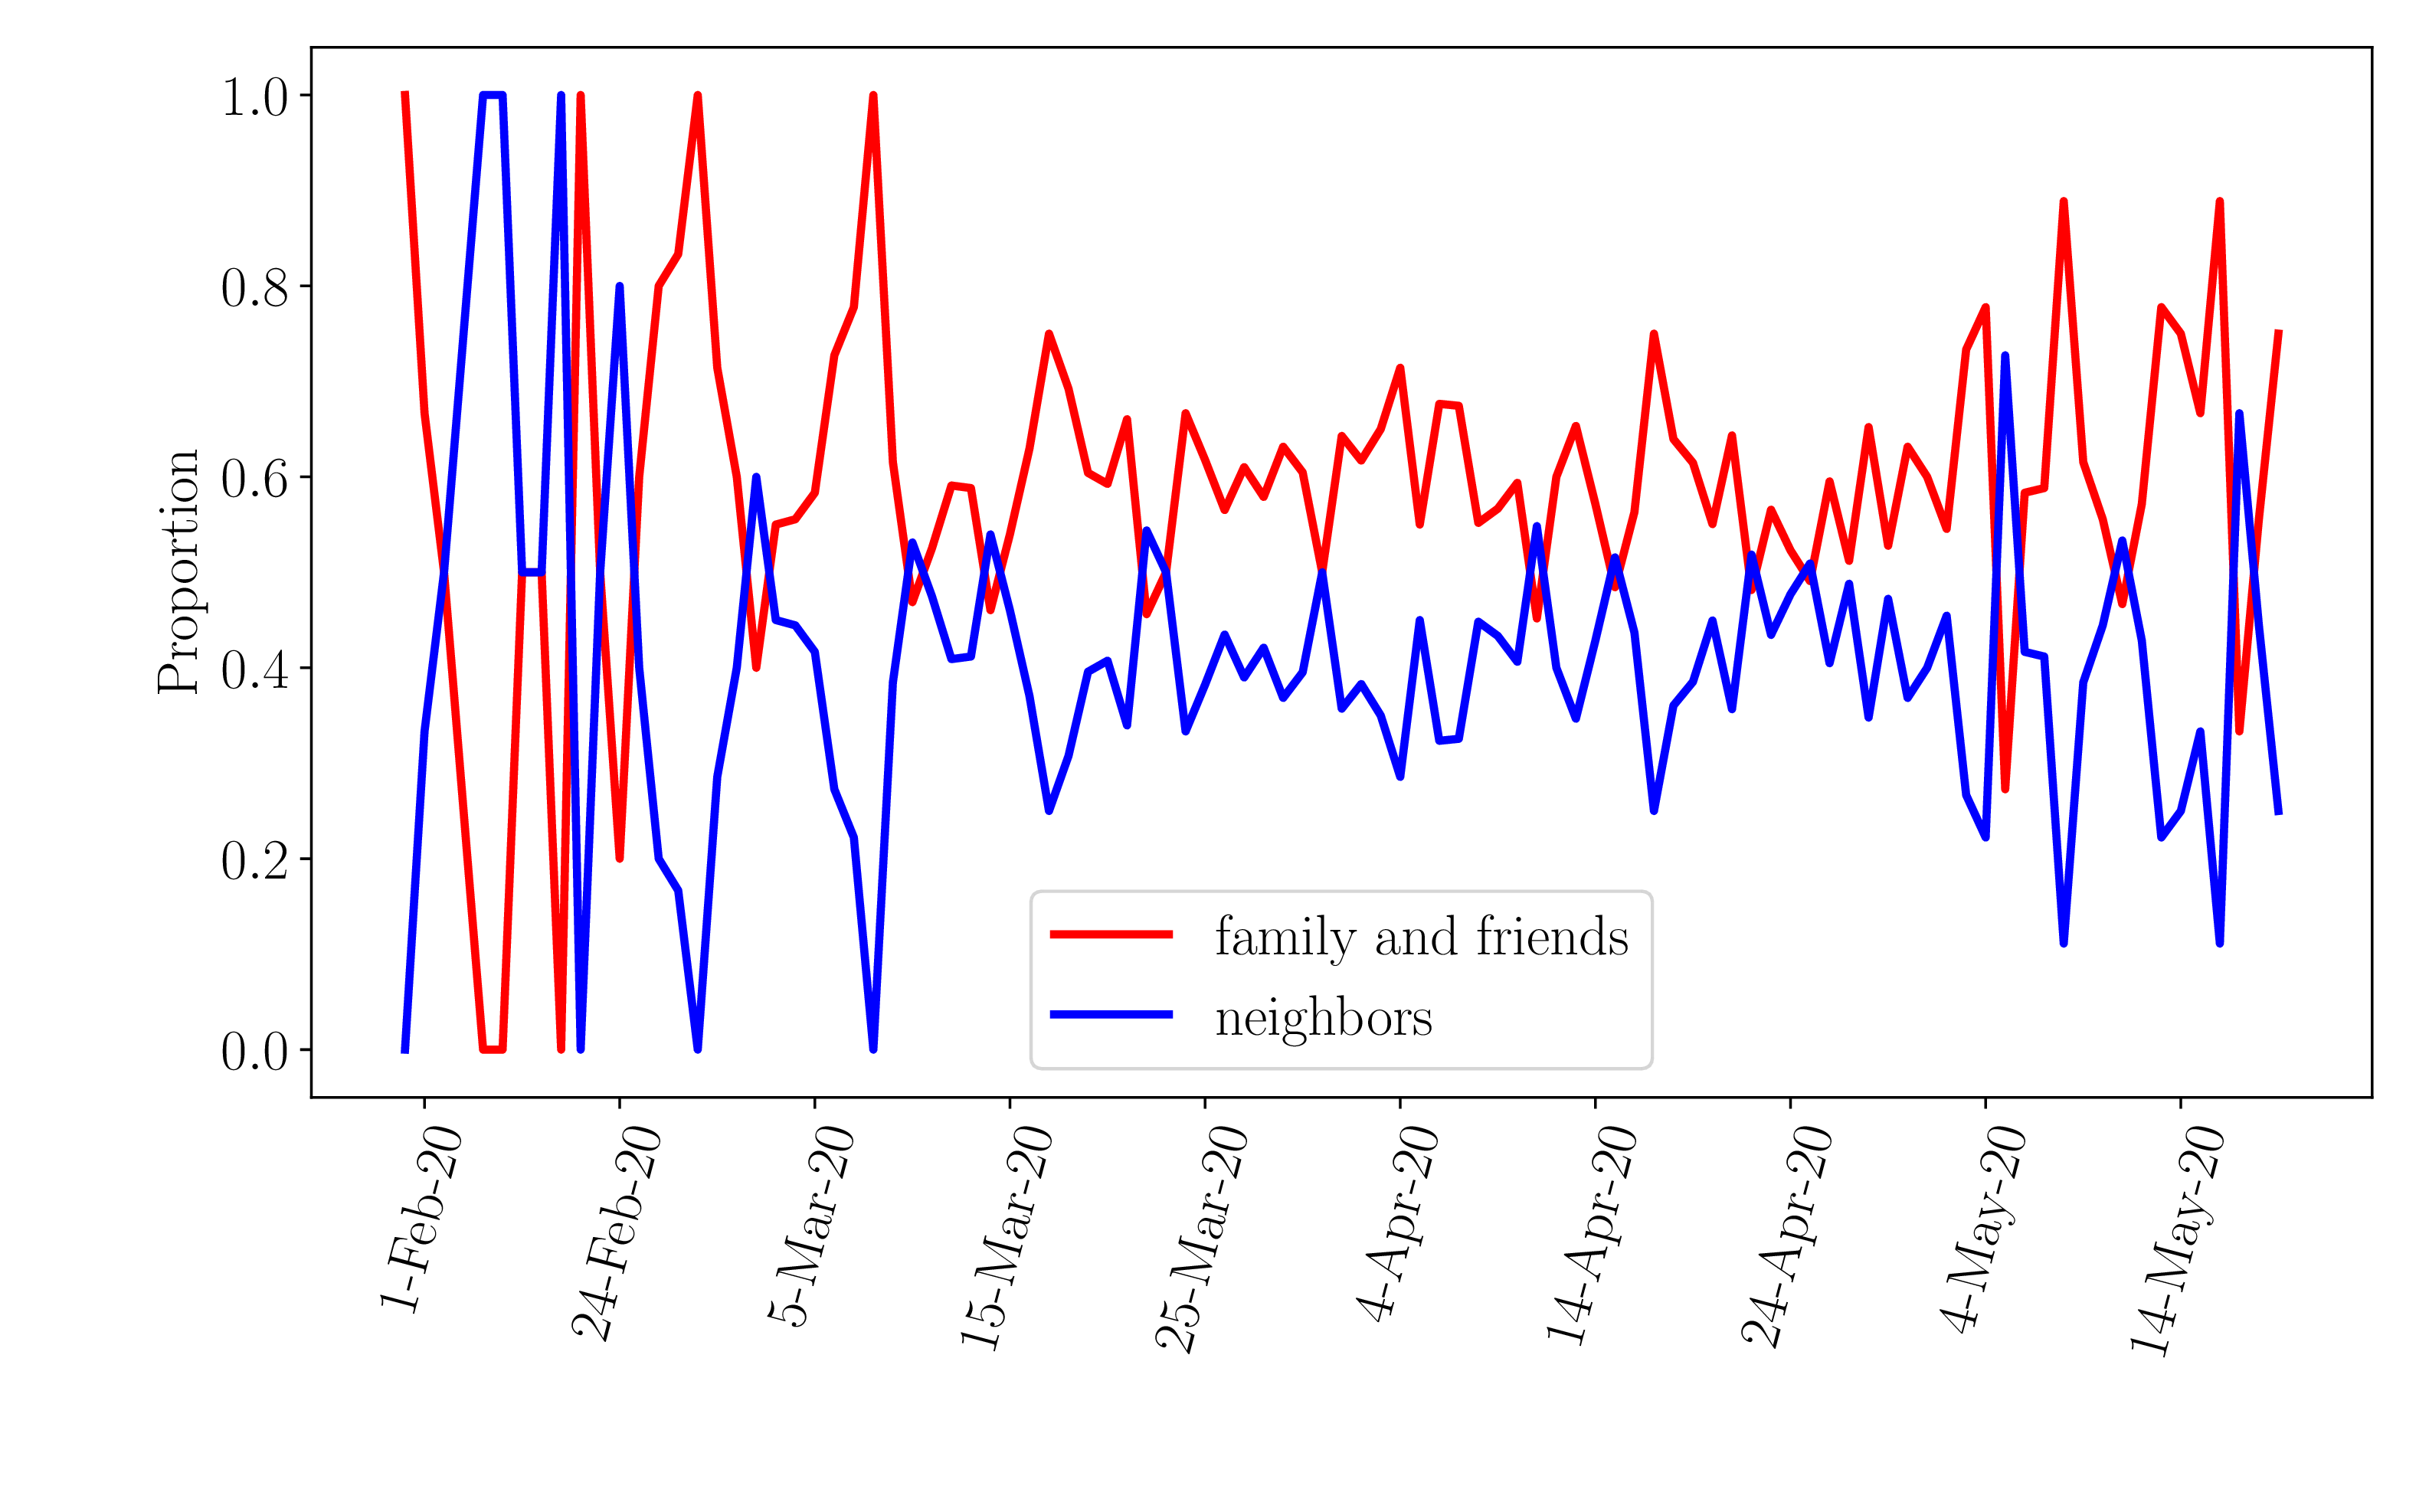
**

**Figure 5S.** Changes in the prevalence of tweet content of themes within “personal experiences” tweets related to older adults and COVID-19 from January 23rd to May 20th, 2020. The denominator was the total number of tweets within “personal experiences” tweets for the day.

**
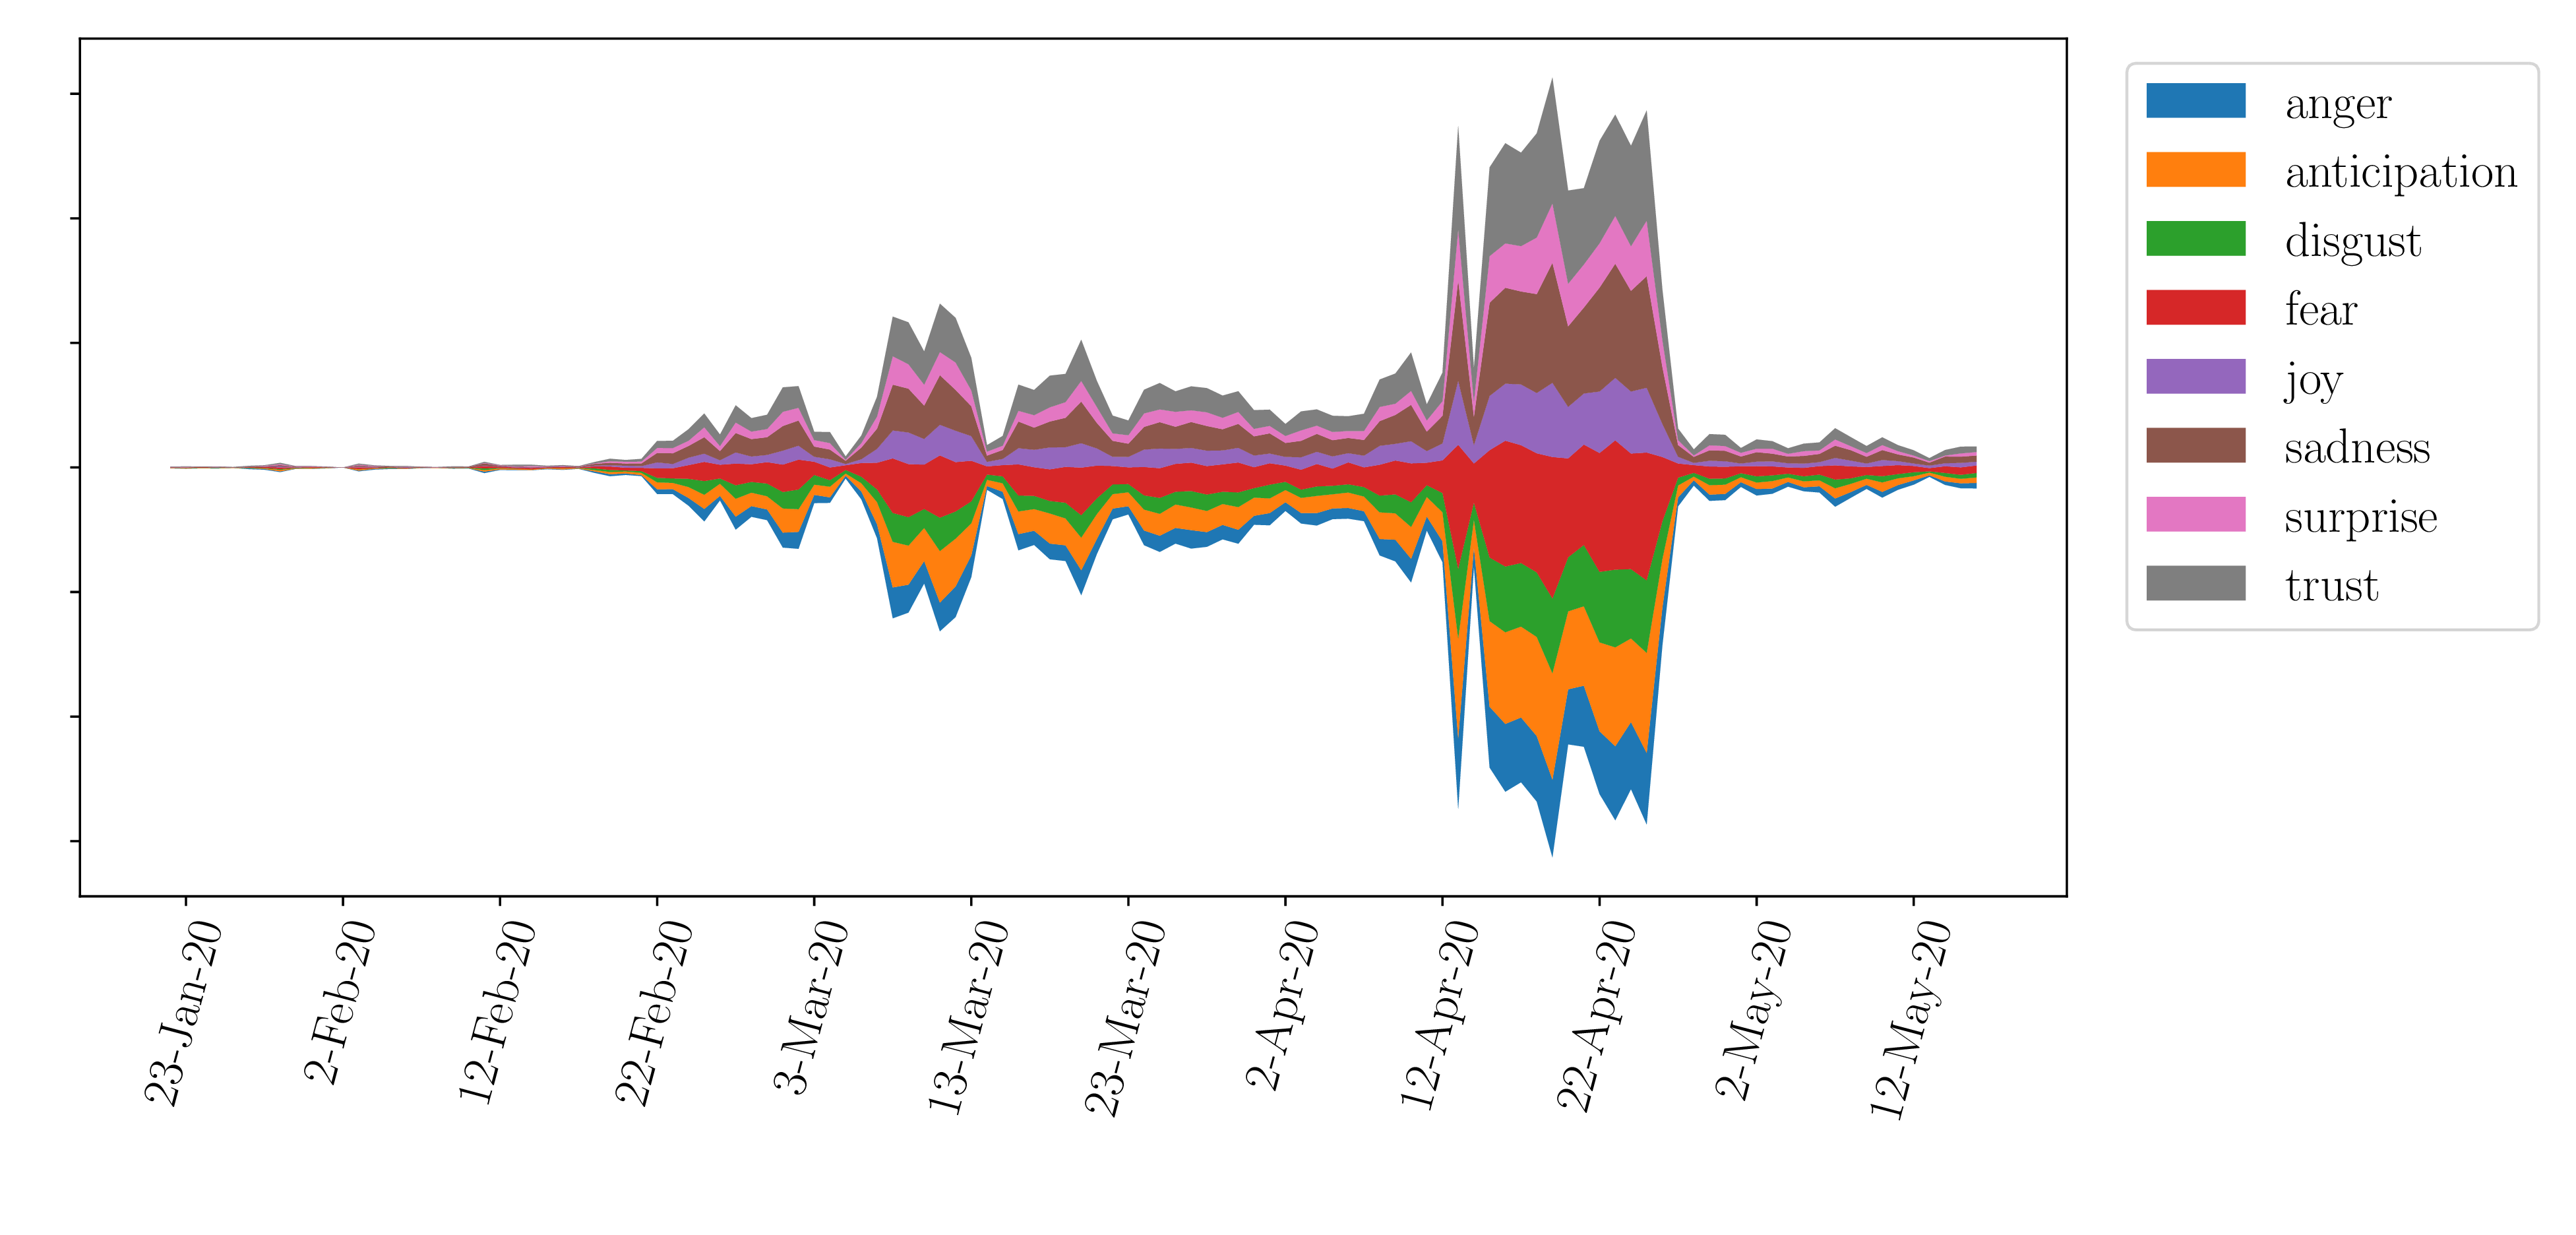
Figure 6S.** Changes in the prevalence of NRC emotions in the theme “to lock down or not to lock down” within “personal opinions” tweets related to older adults and COVID-19 from January 23rd to May 20th, 2020

**
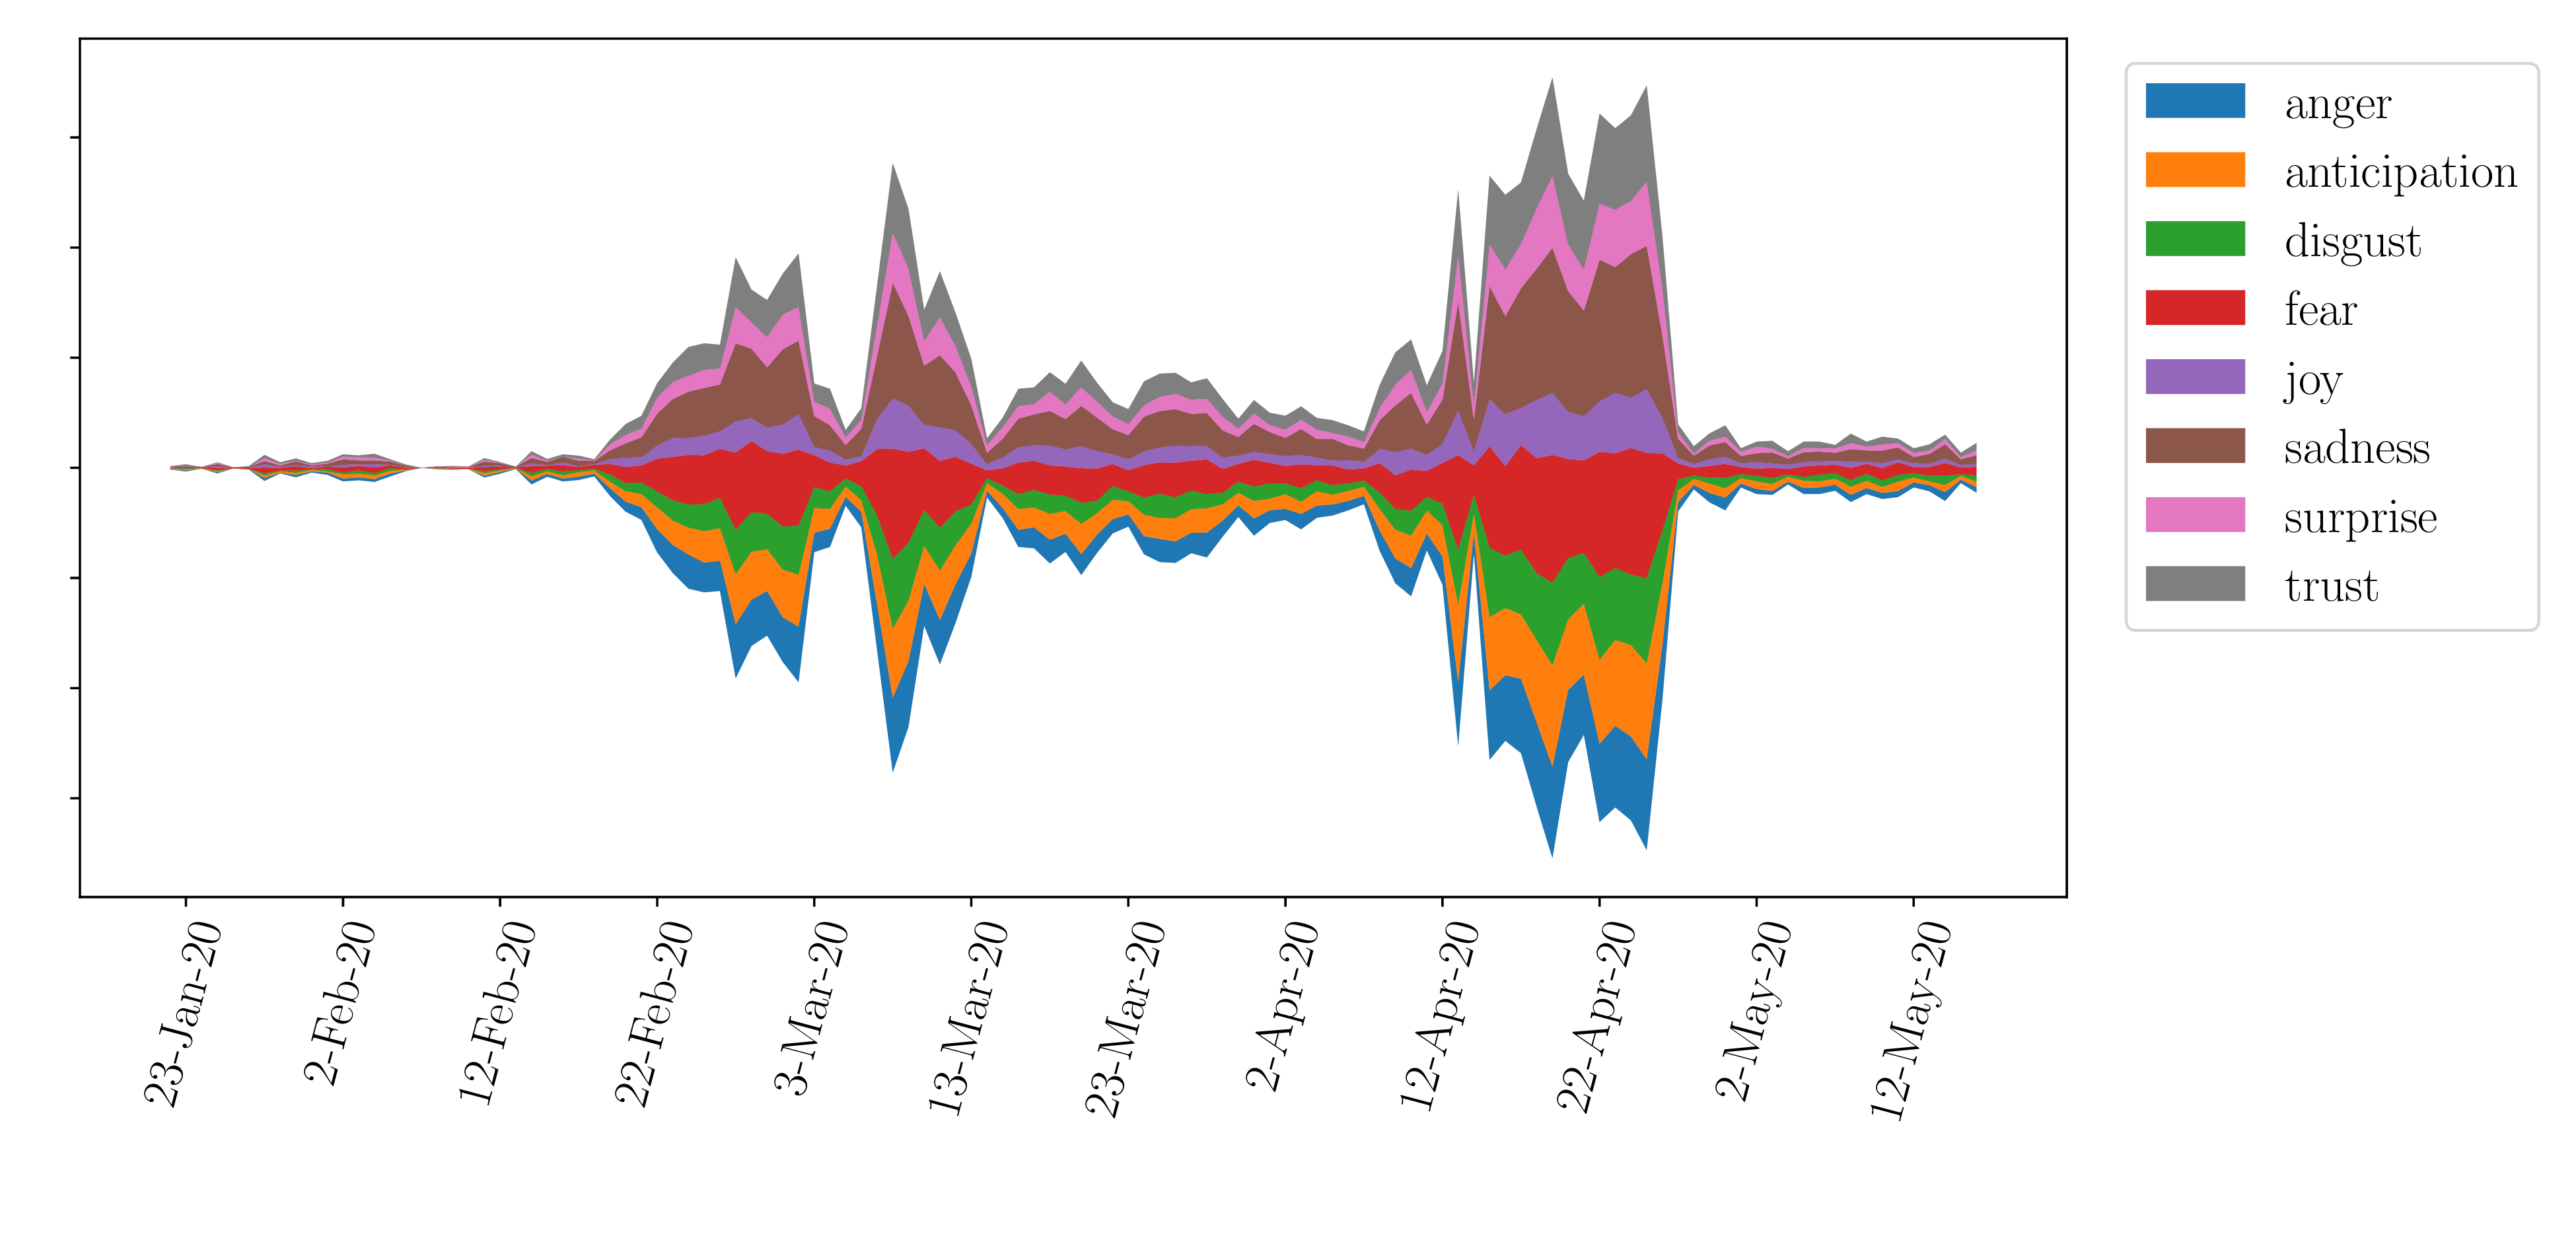
Figure 7S.** Changes in the prevalence of NRC emotions in the theme “pandemic severity” within “personal opinions” tweets related to older adults and COVID-19 from January 23rd to May 20th, 2020

**
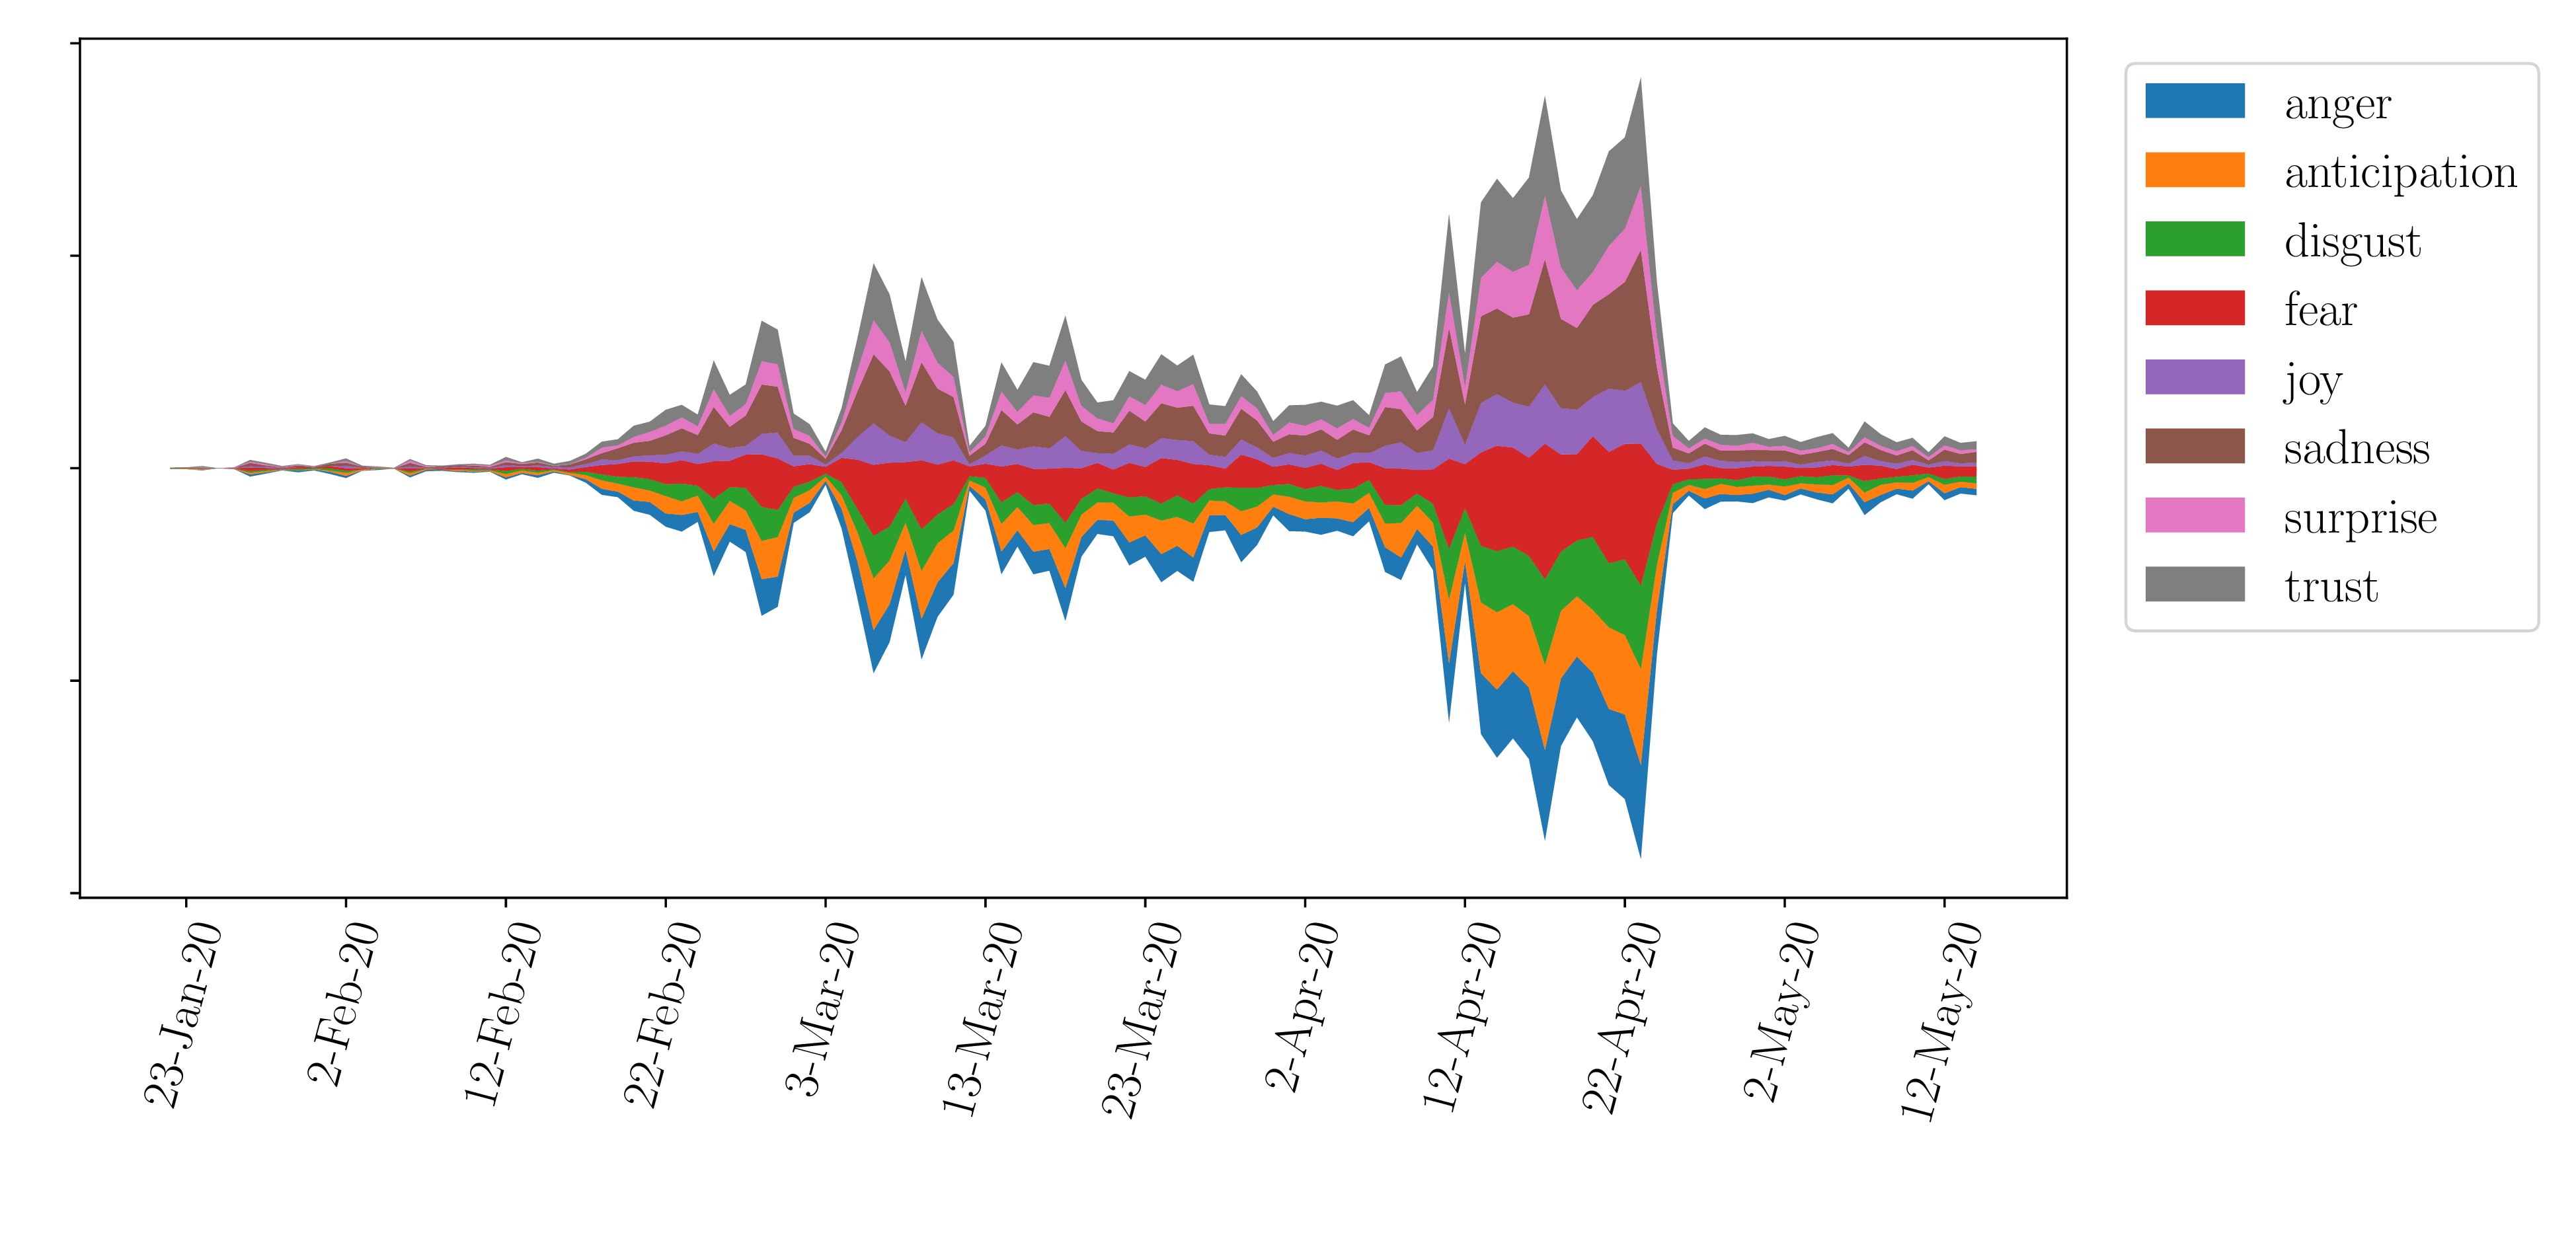
Figure 8S.** Changes in the prevalence of NRC emotions in the theme “perception of risk” within “personal opinions” tweets related to older adults and COVID-19 from January 23rd to May 20th, 2020

**
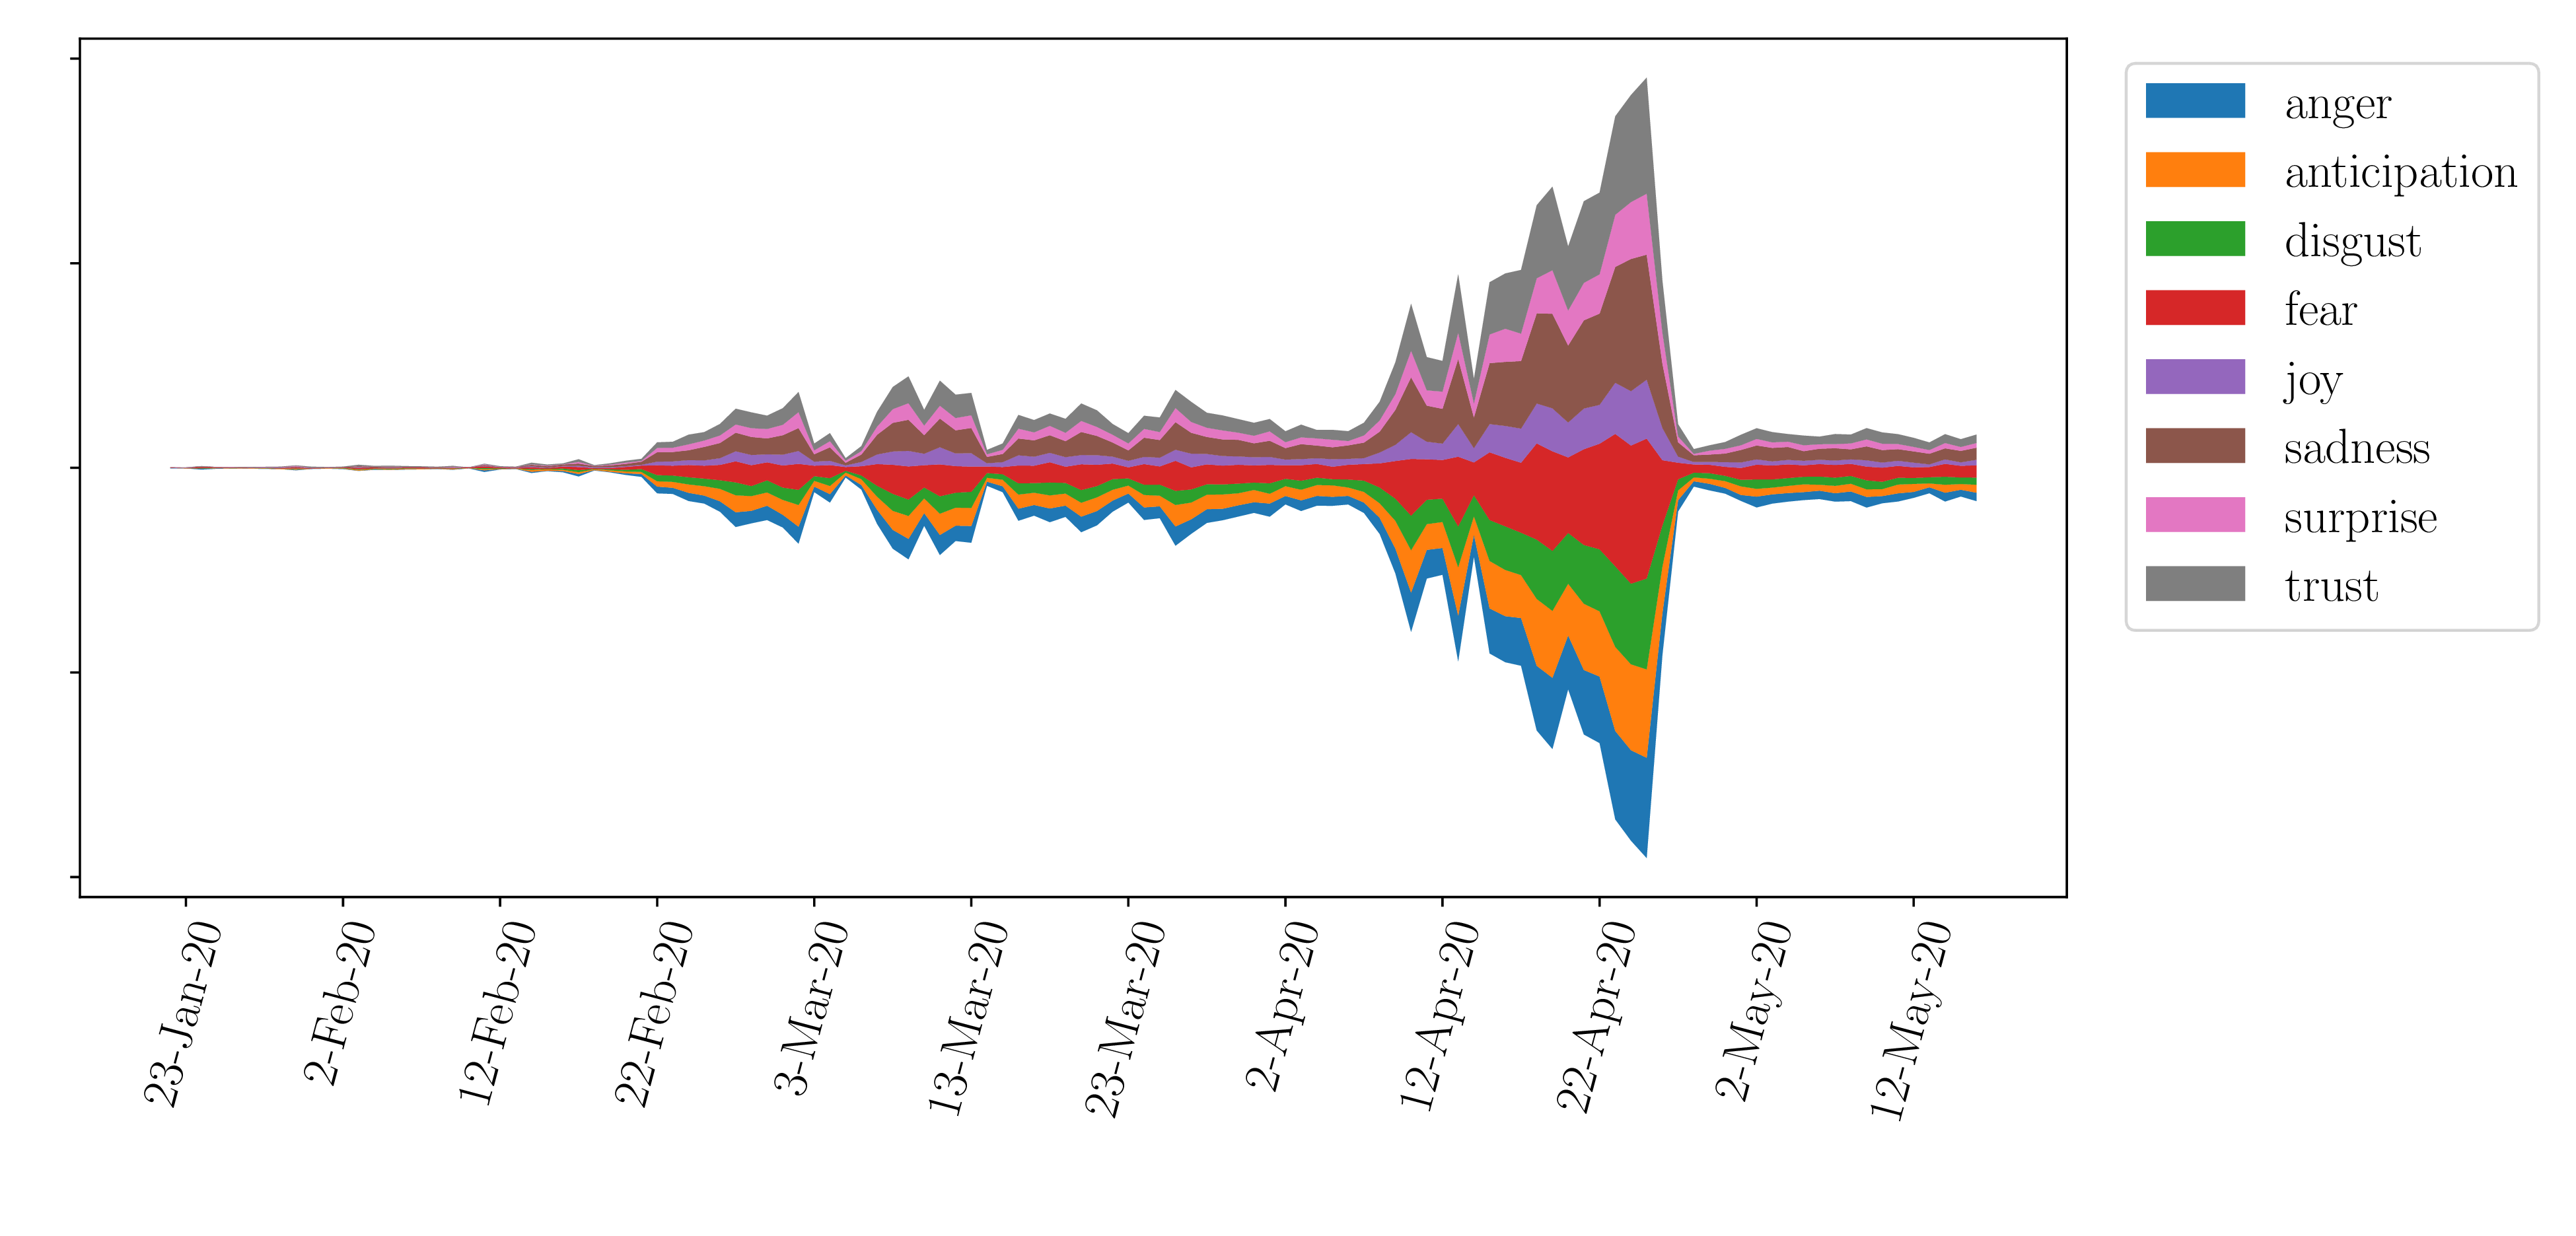
**

**Figure 9S.** Changes in the prevalence of NRC emotions in the theme “long-term care facilities” within “personal opinions” tweets related to older adults and COVID-19 from January 23rd to May 20th, 2020

**
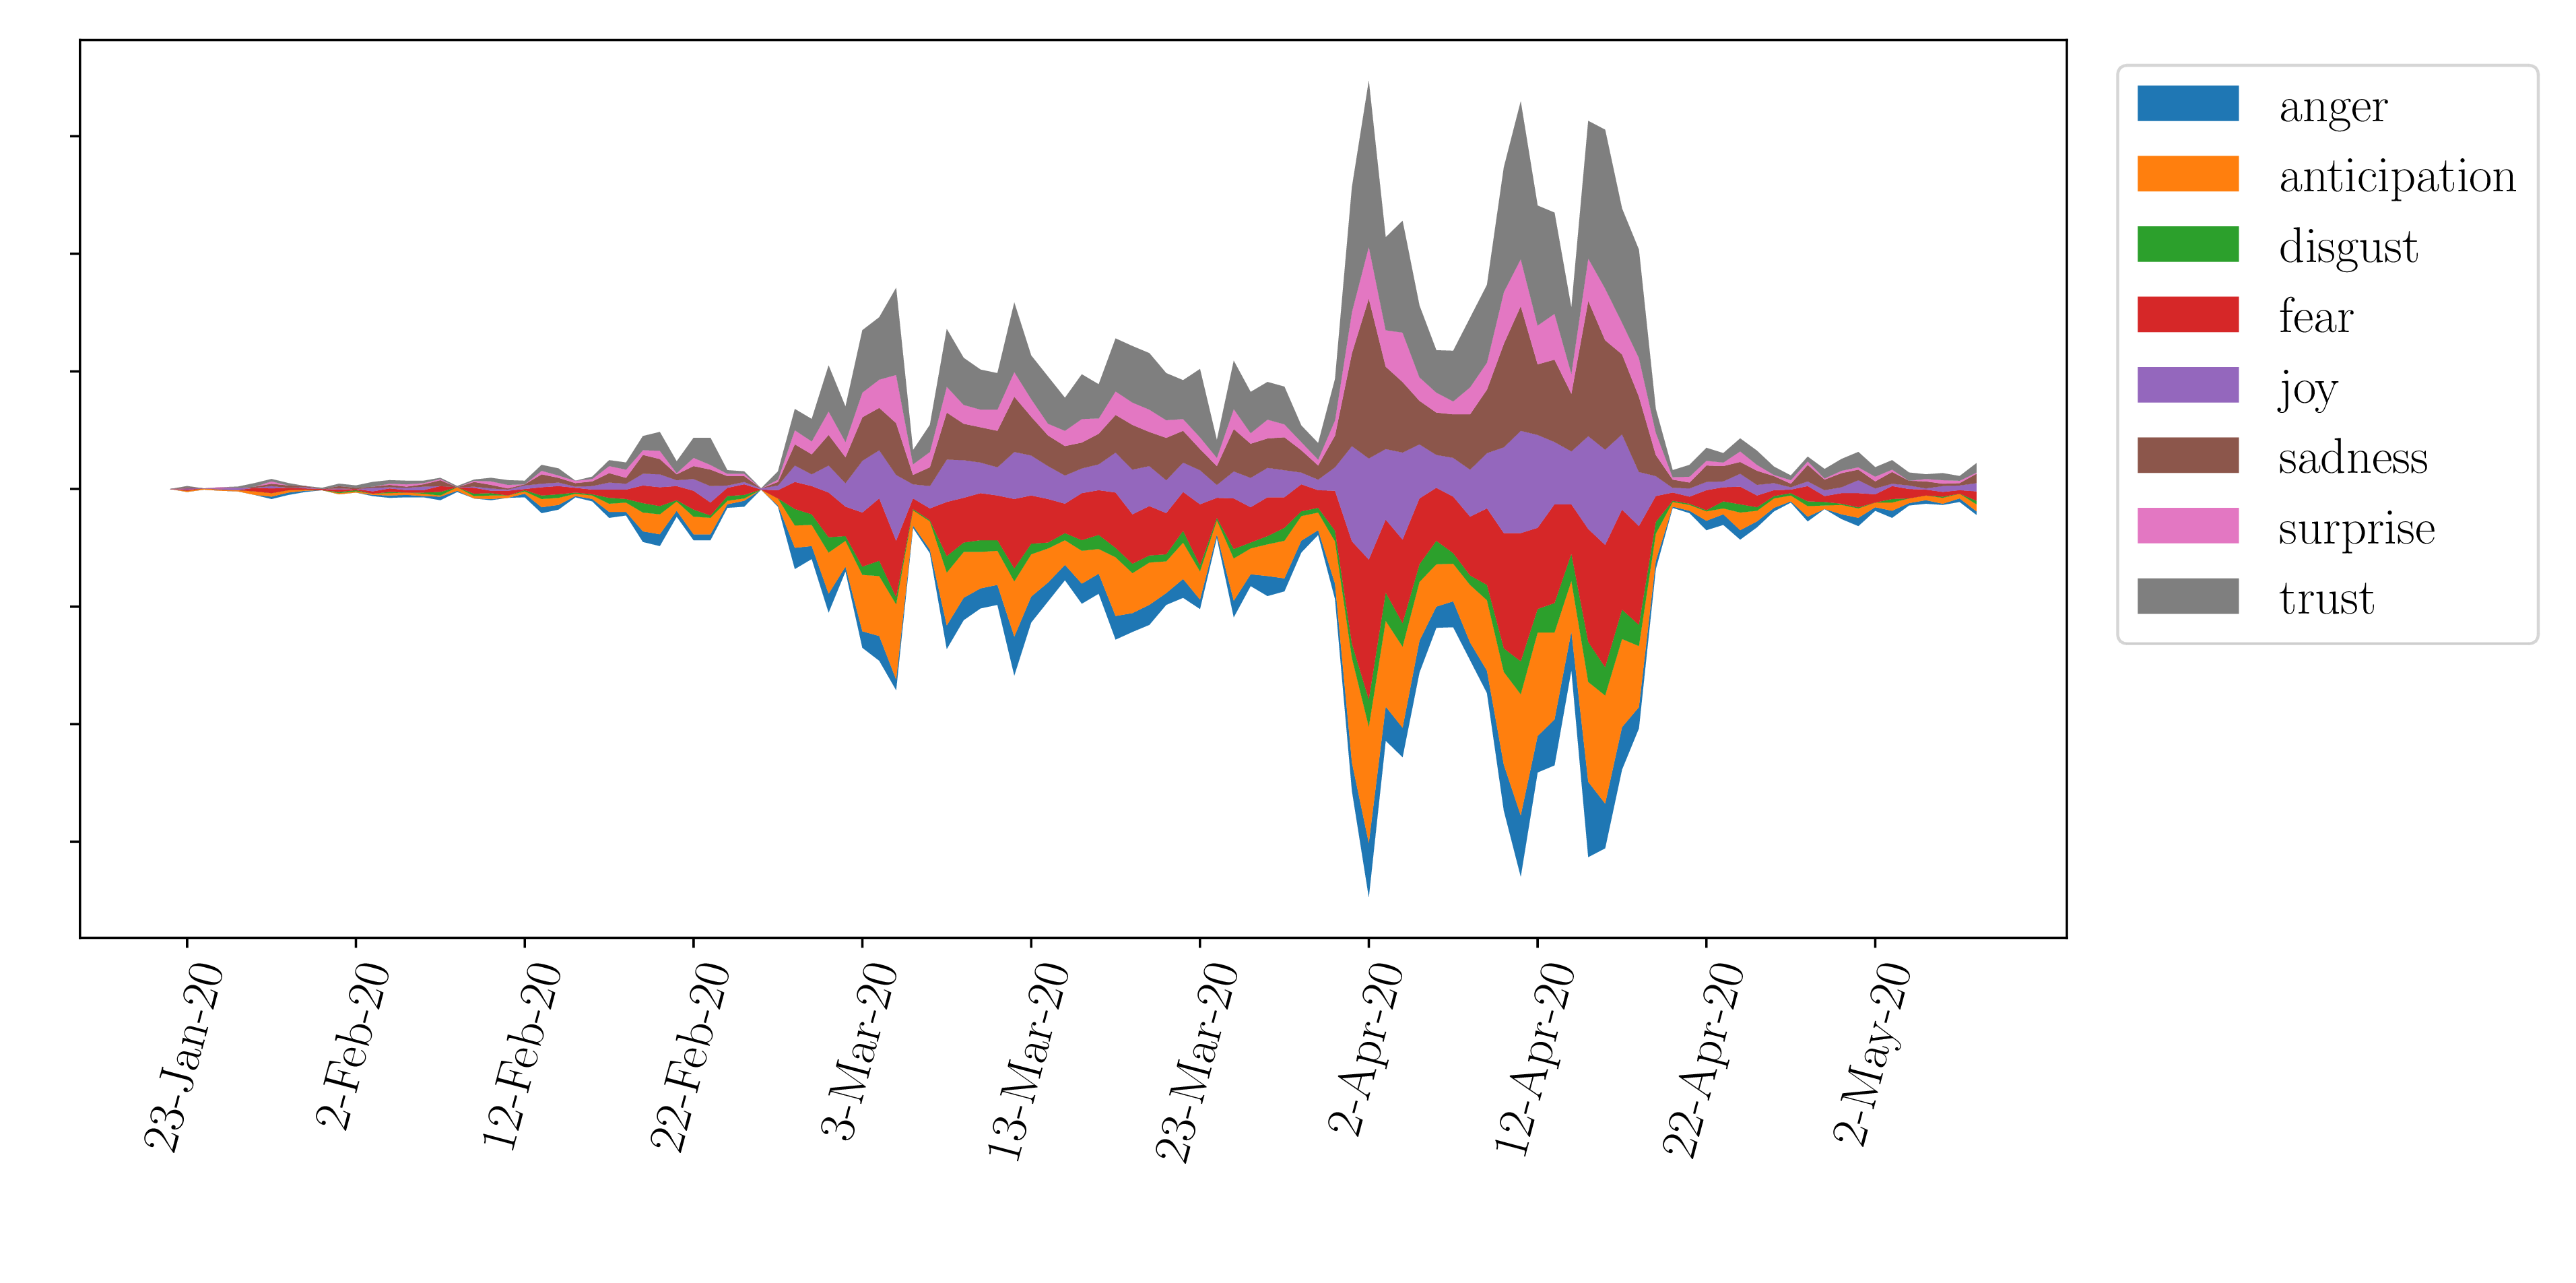
**

**Figure 10S.** Changes in the prevalence of NRC emotions in the theme “basic needs” within “informative” tweets related to older adults and COVID-19 from January 23rd to May 20th, 2020

**
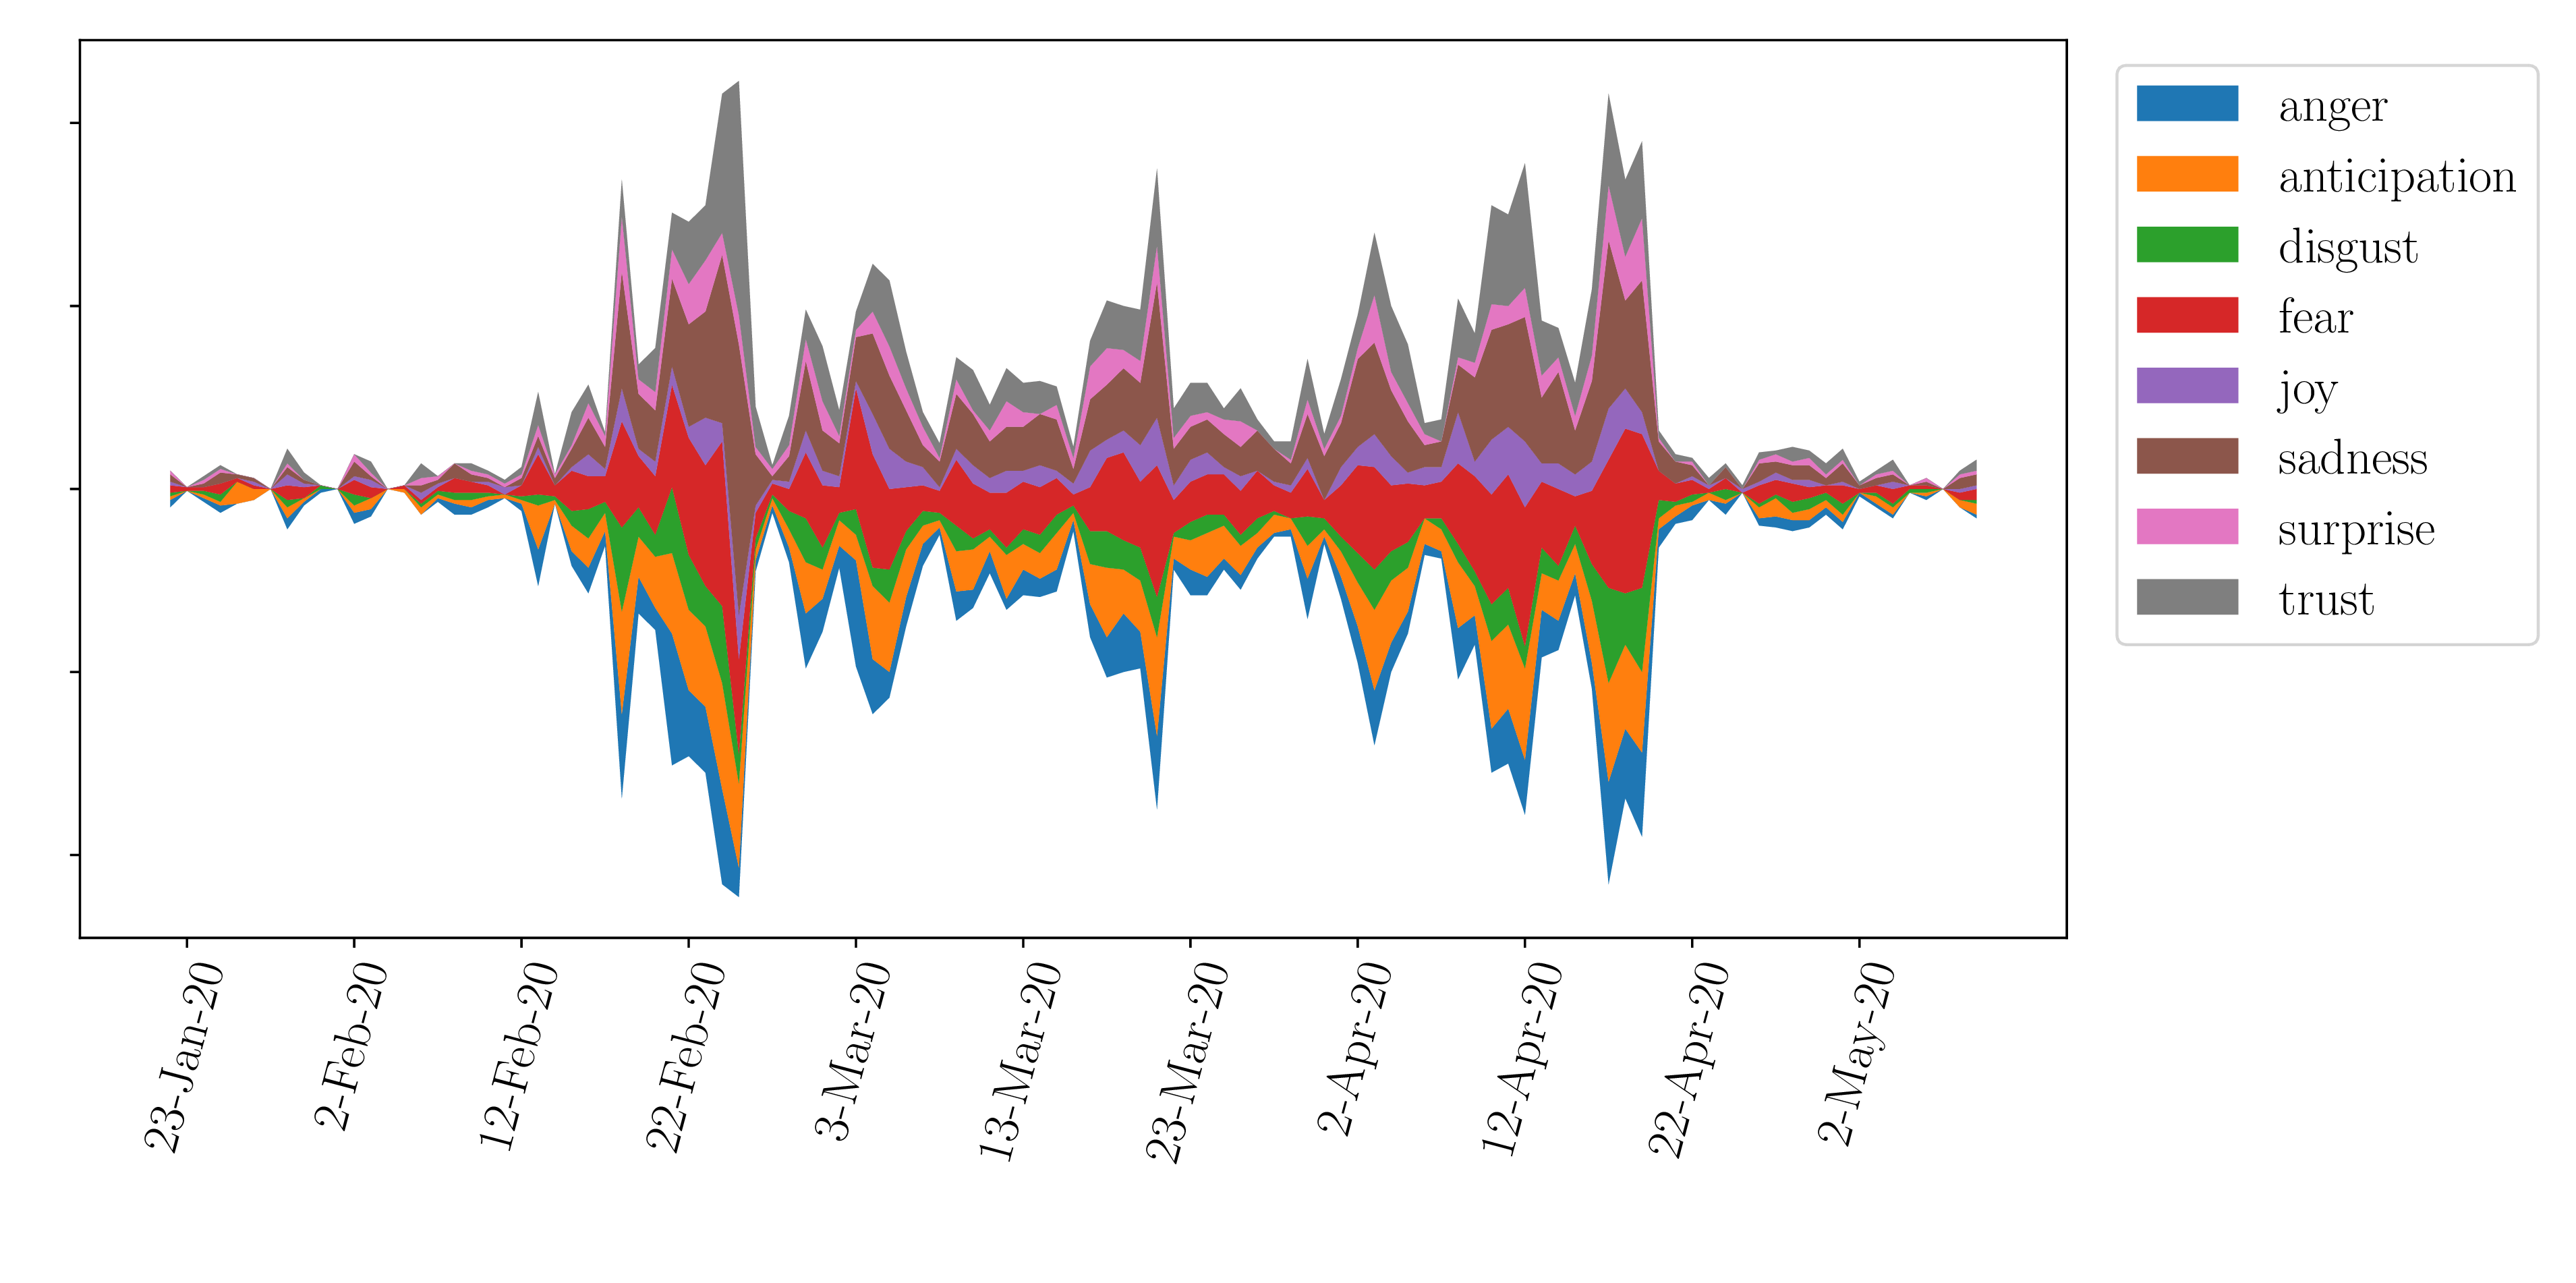
Figure 11S.** Changes in the prevalence of NRC emotions in the theme “at-risk populations” within “informative” tweets related to older adults and COVID-19 from January 23rd to May 20th, 2020

**
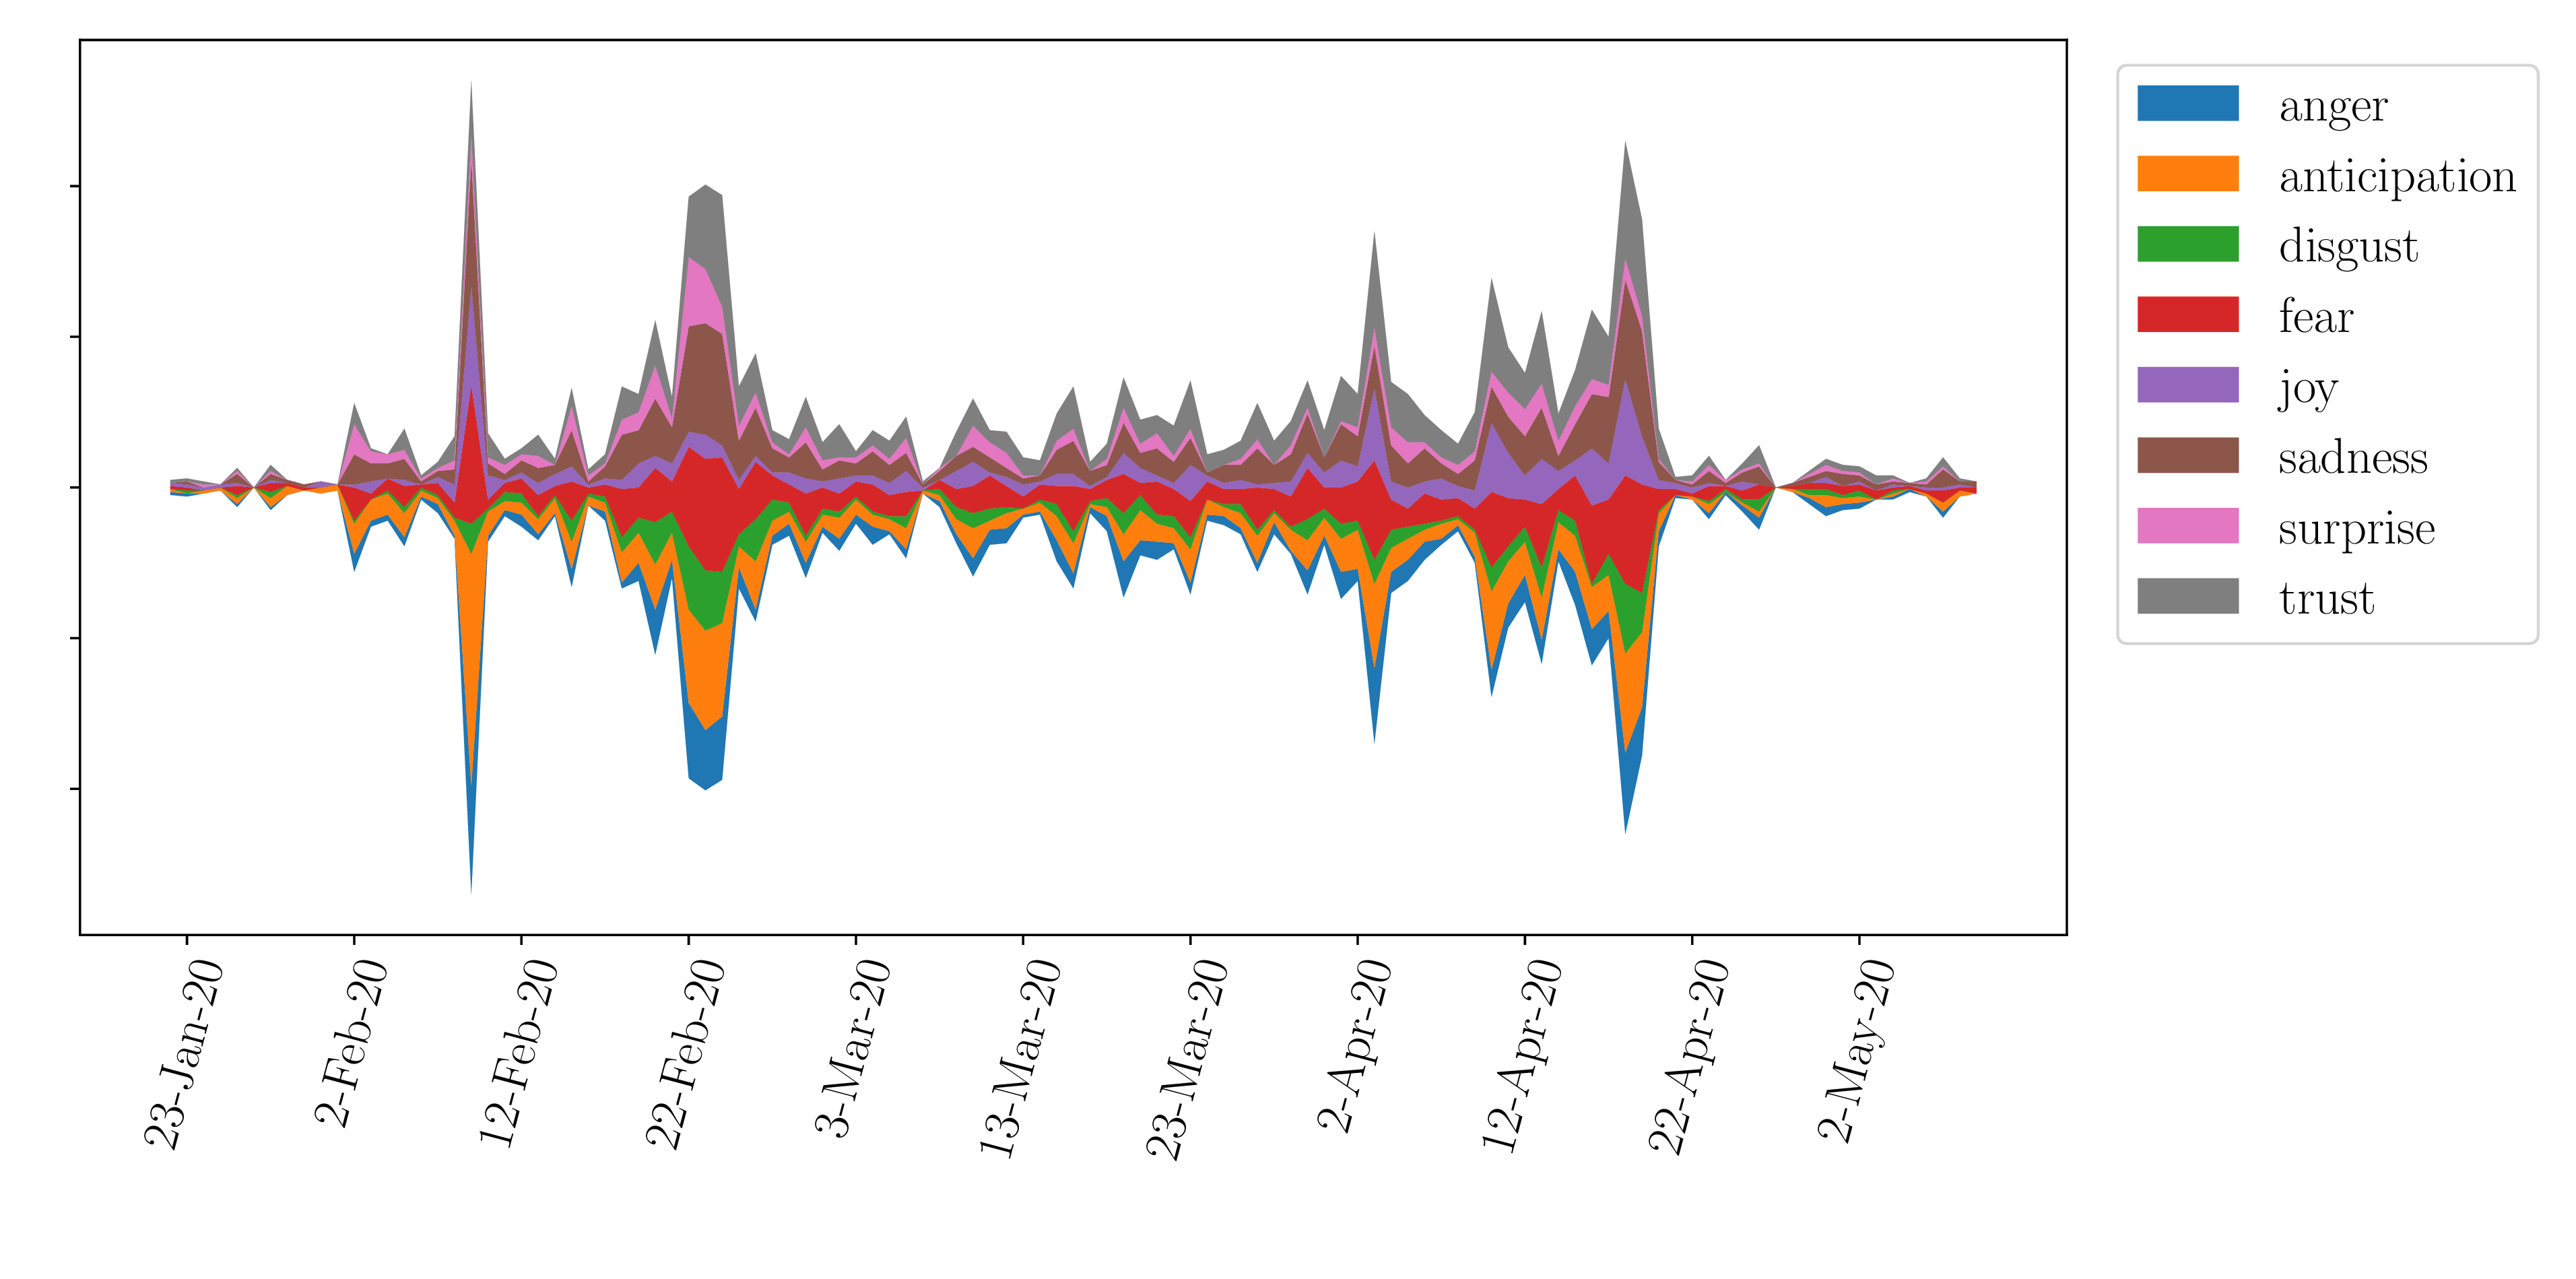
**

**Figure 12S.** Changes in the prevalence of NRC emotions in the theme “pandemic updates” within “informative” tweets related to older adults and COVID-19 from January 23rd to May 20th, 2020

**
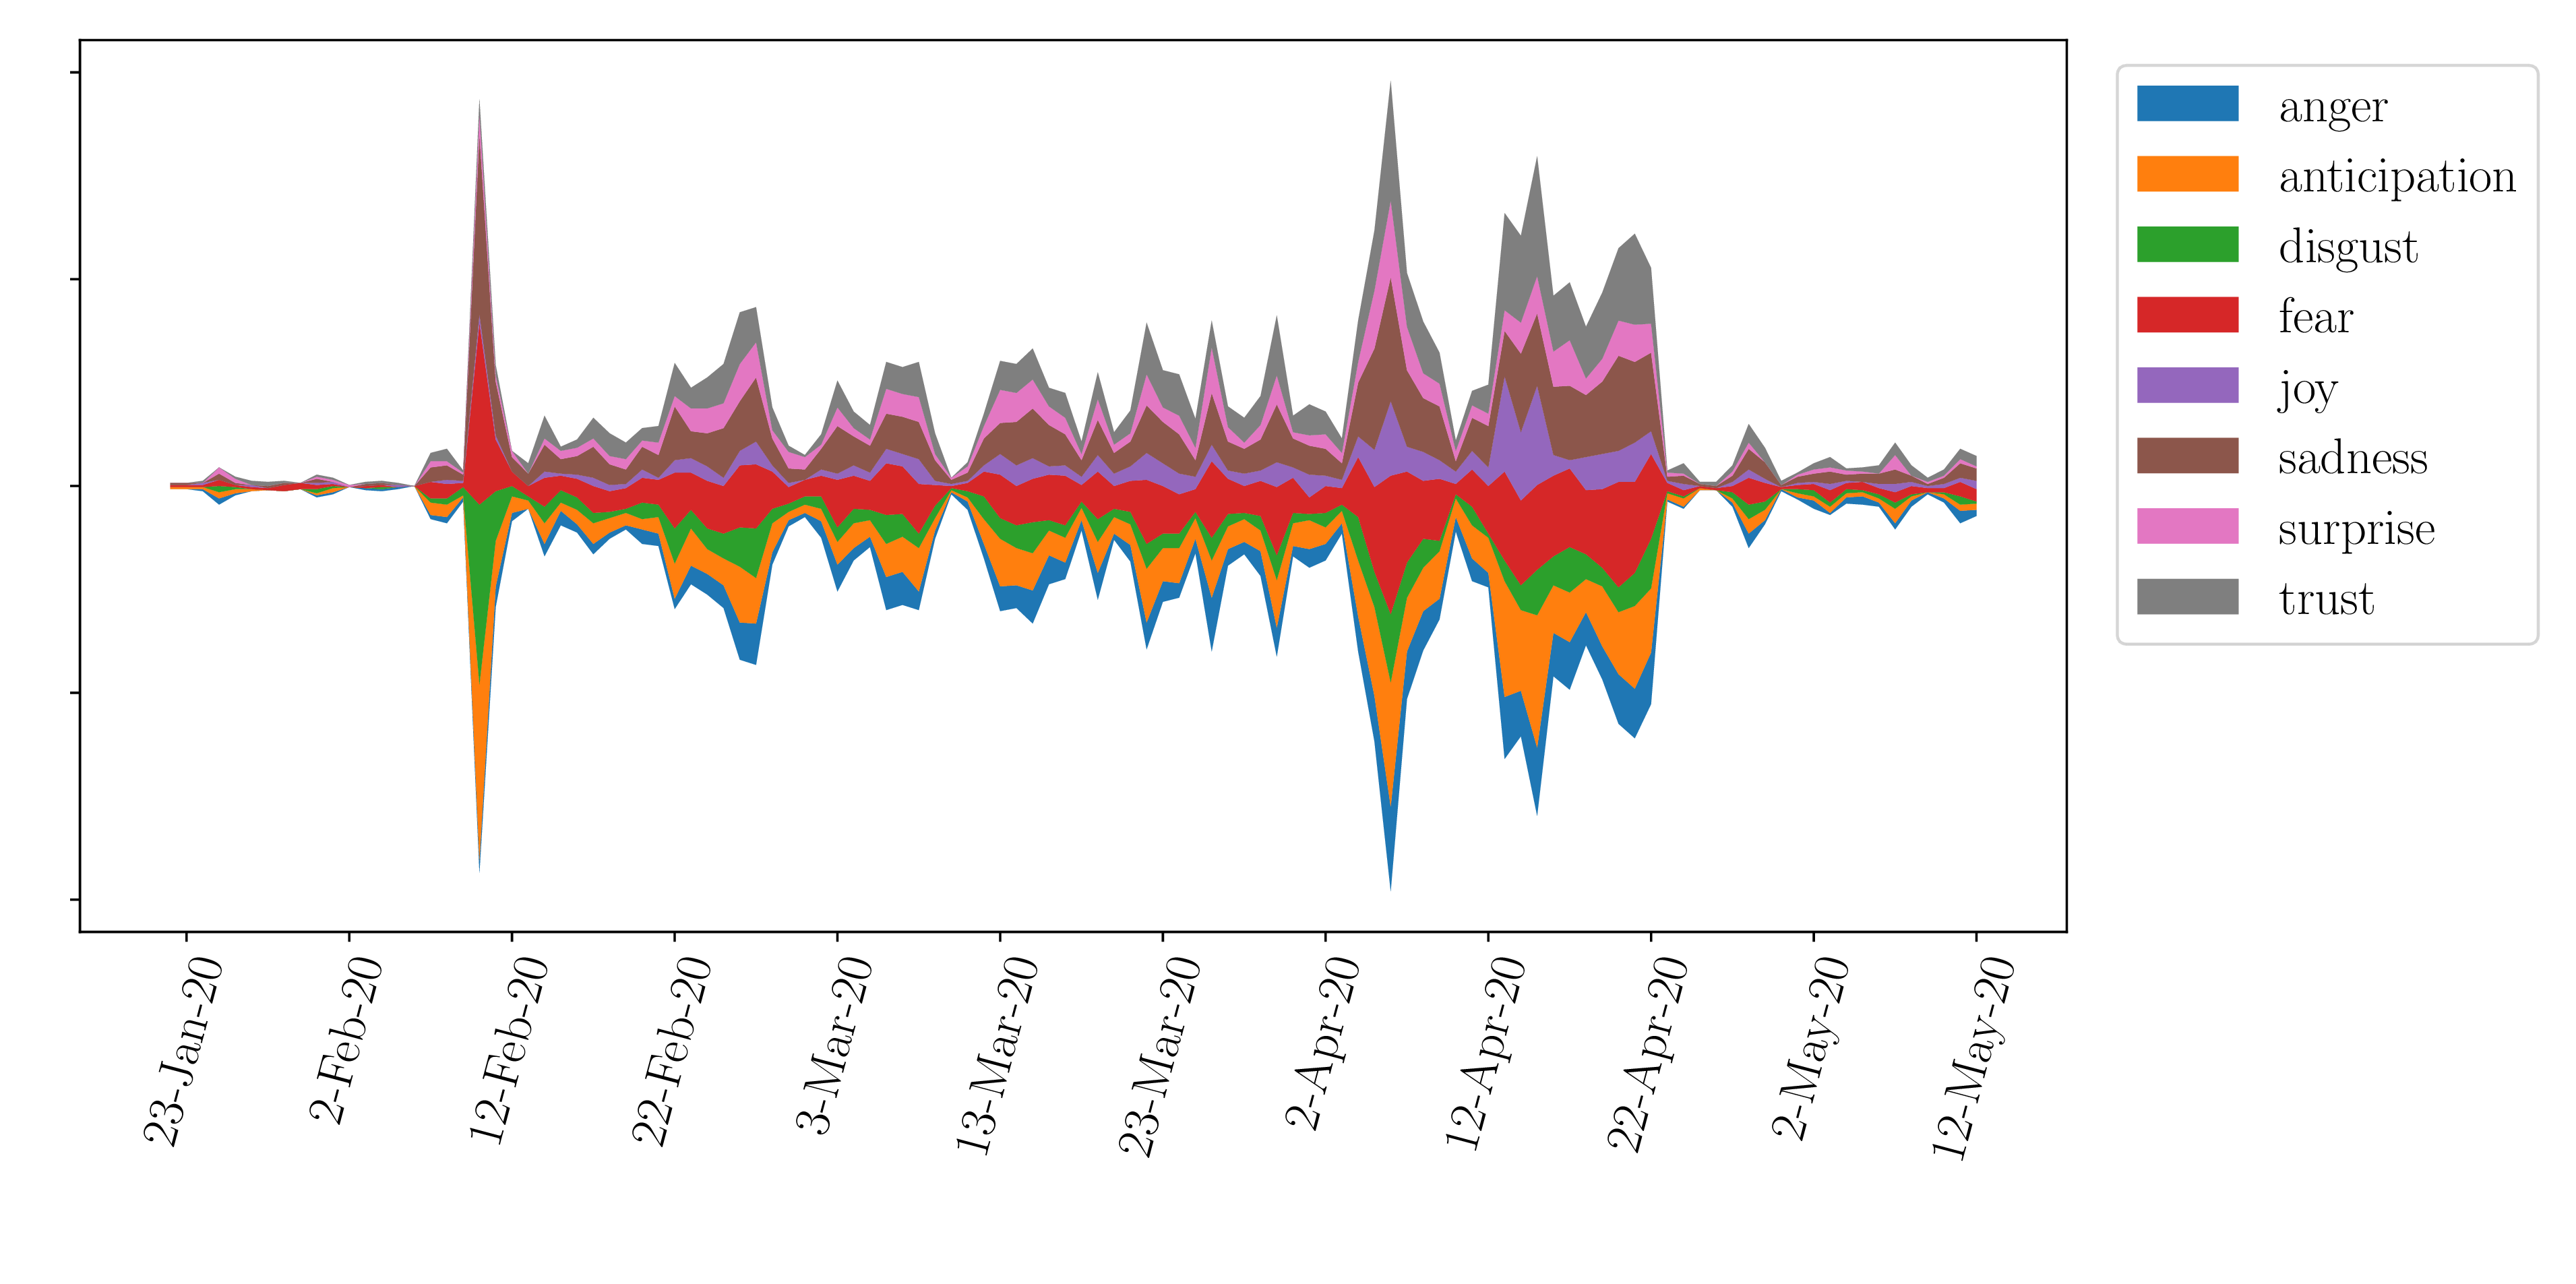
Figure 13S.** Changes in the prevalence of NRC emotions in the theme “long-term care facilities” within “informative” tweets related to older adults and COVID-19 from January 23rd to May 20th, 2020

**
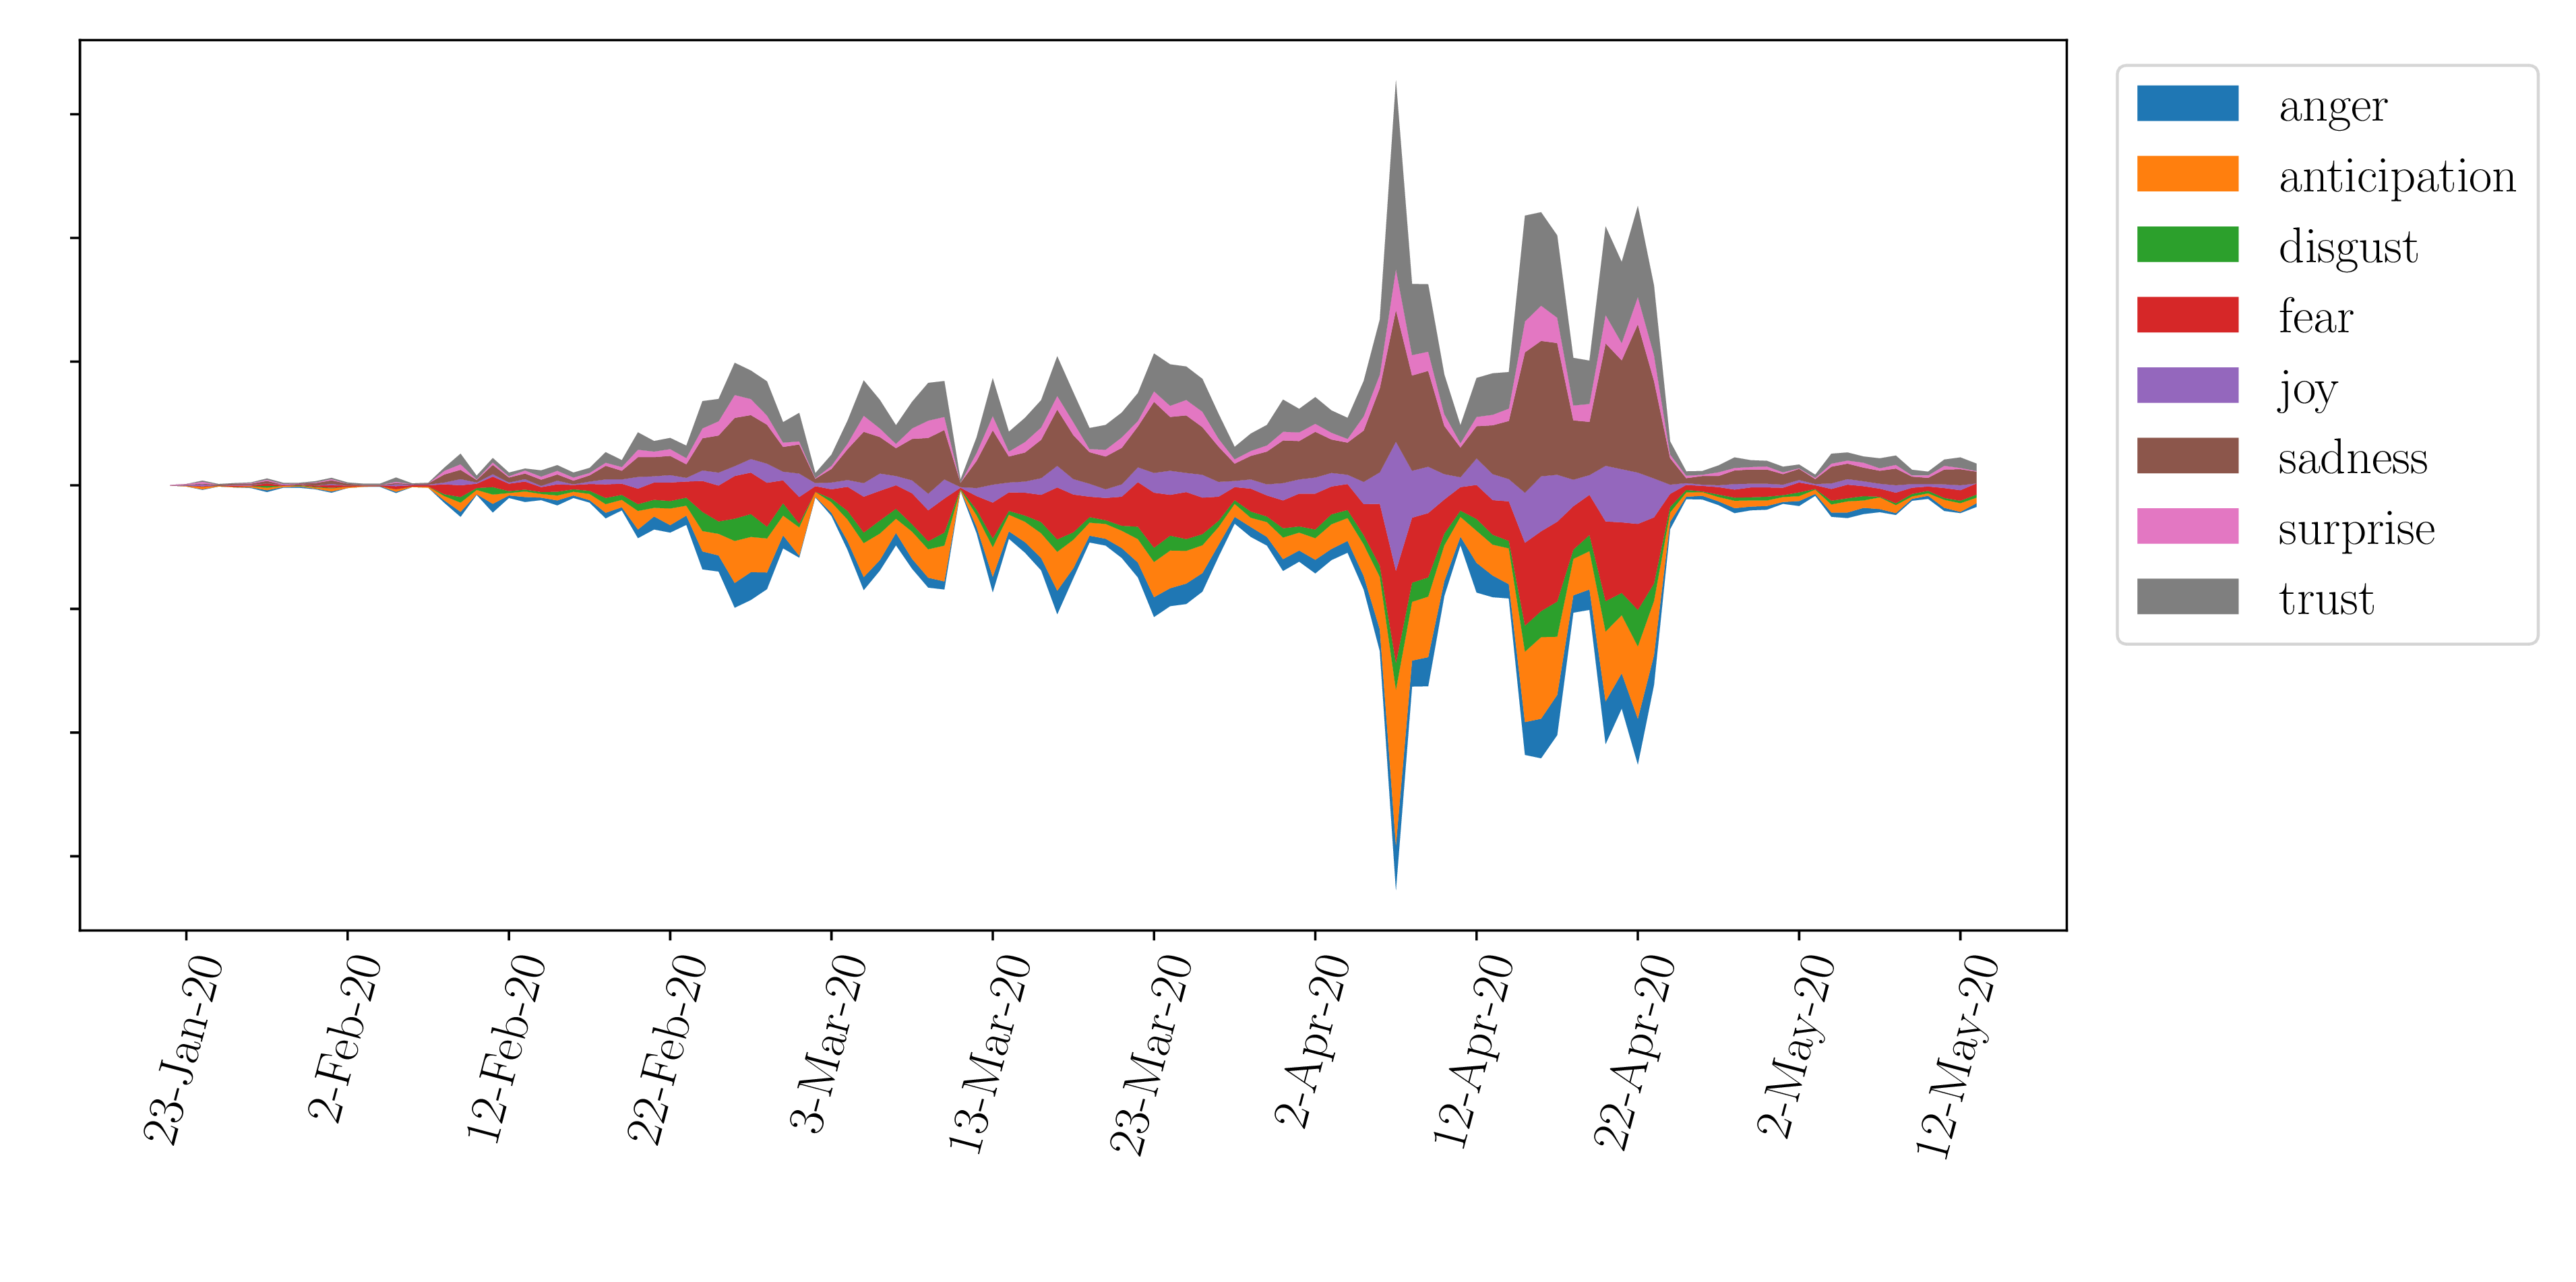
**

**Figure 14S.** Changes in the prevalence of NRC emotions in the theme “mental health toll” within “informative” tweets related to older adults and COVID-19 from January 23rd to May 20th, 2020

**
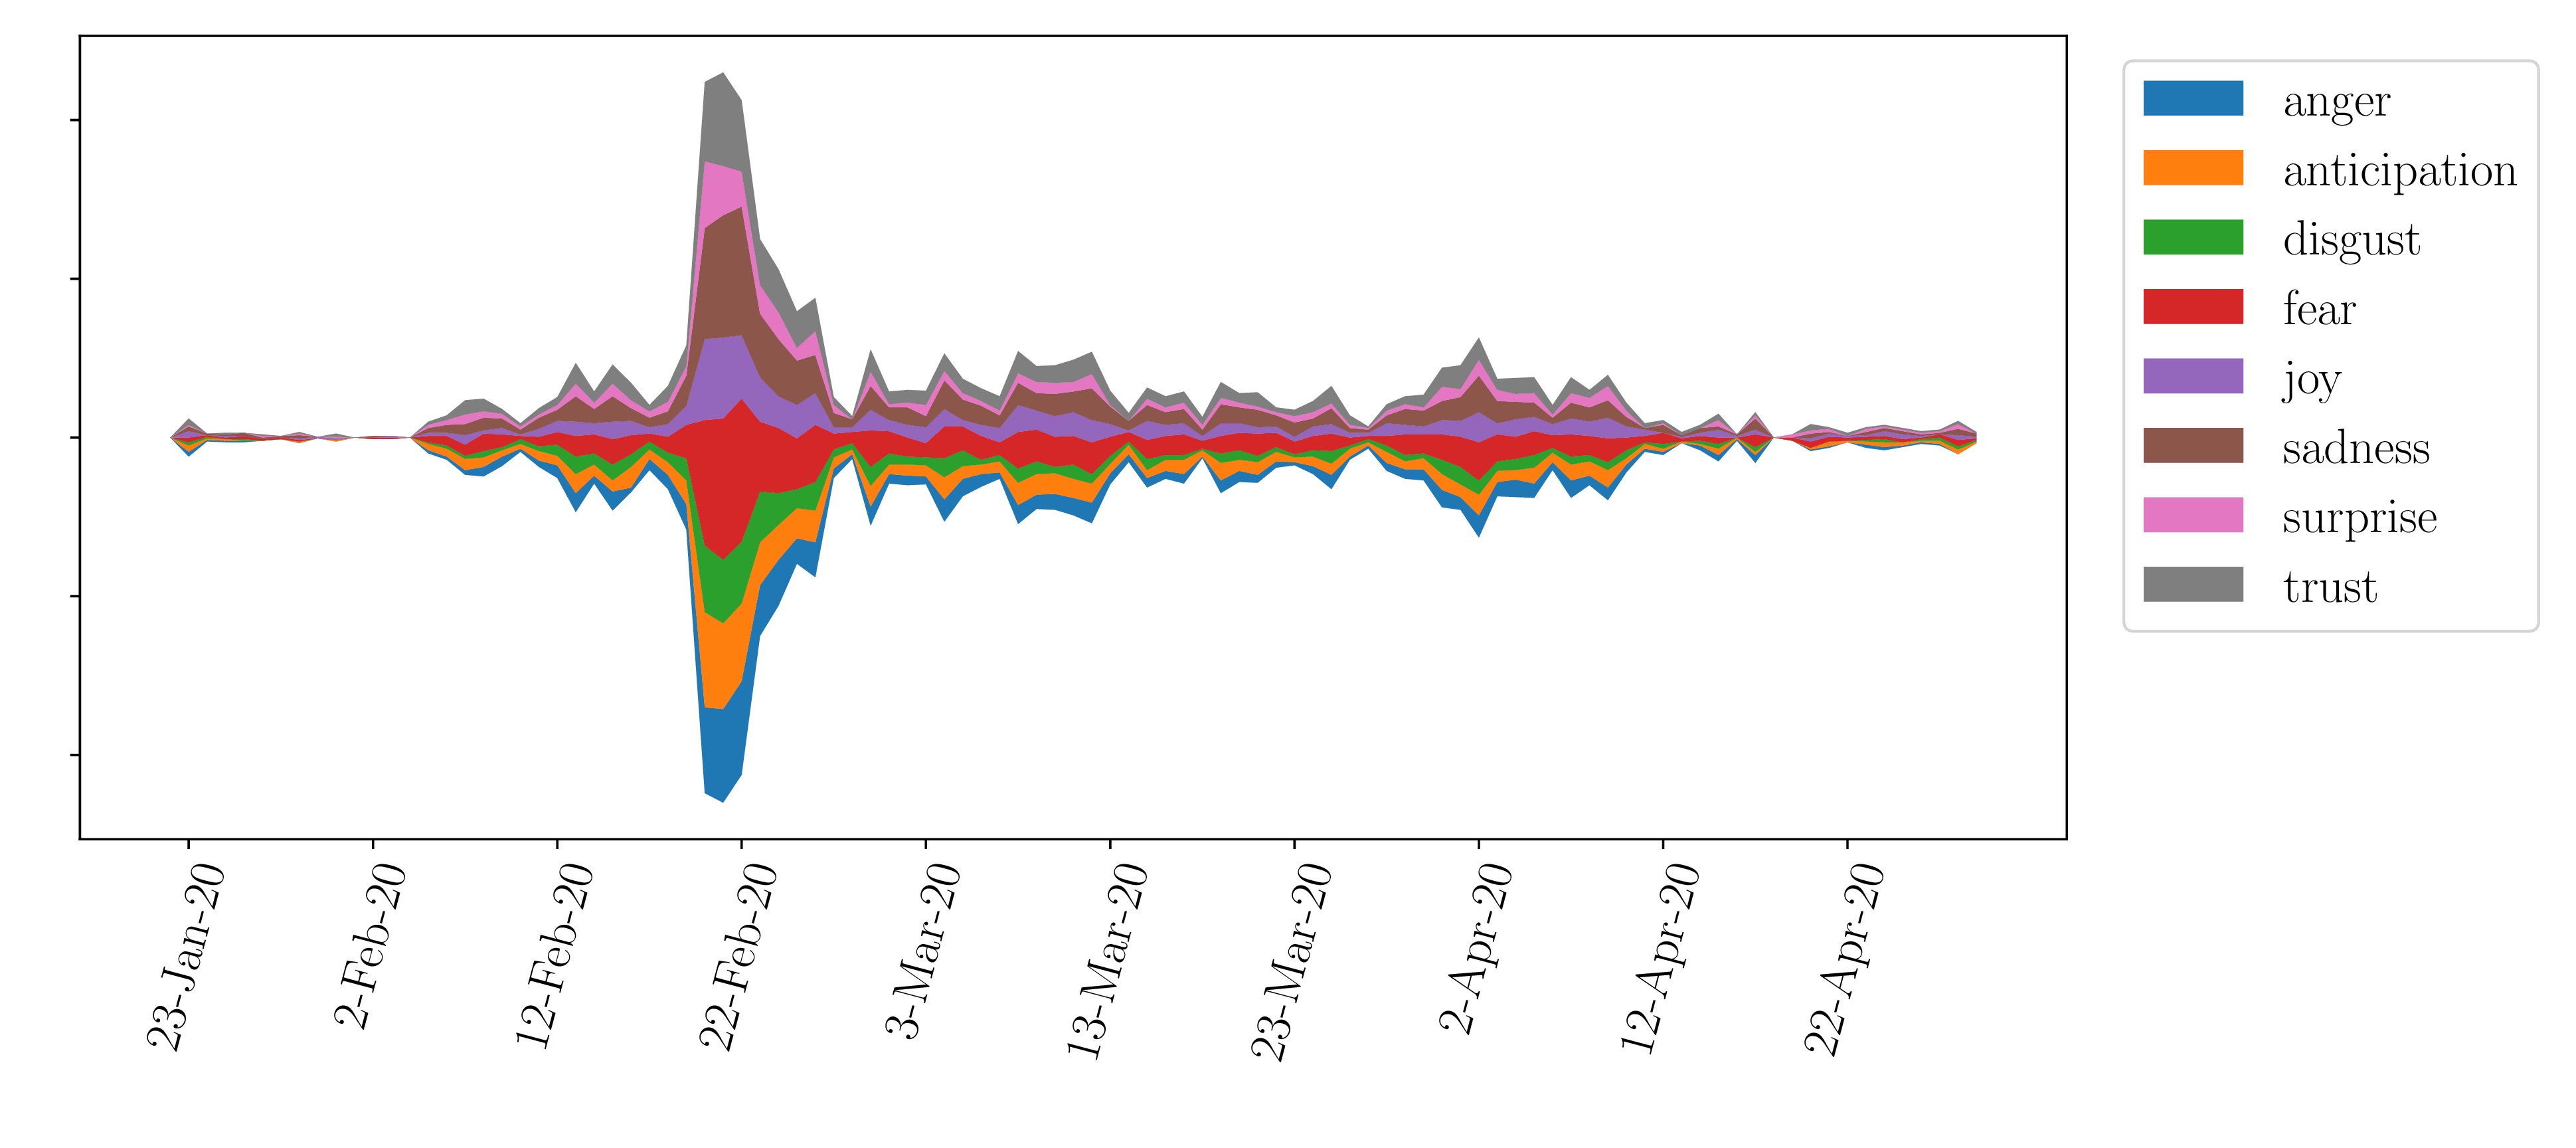
Figure 15S.** Changes in the prevalence of NRC emotions in the theme “intergenerational conflict” within “jokes/ridicule” tweets related to older adults and COVID-19 from January 23rd to May 20th, 2020

**
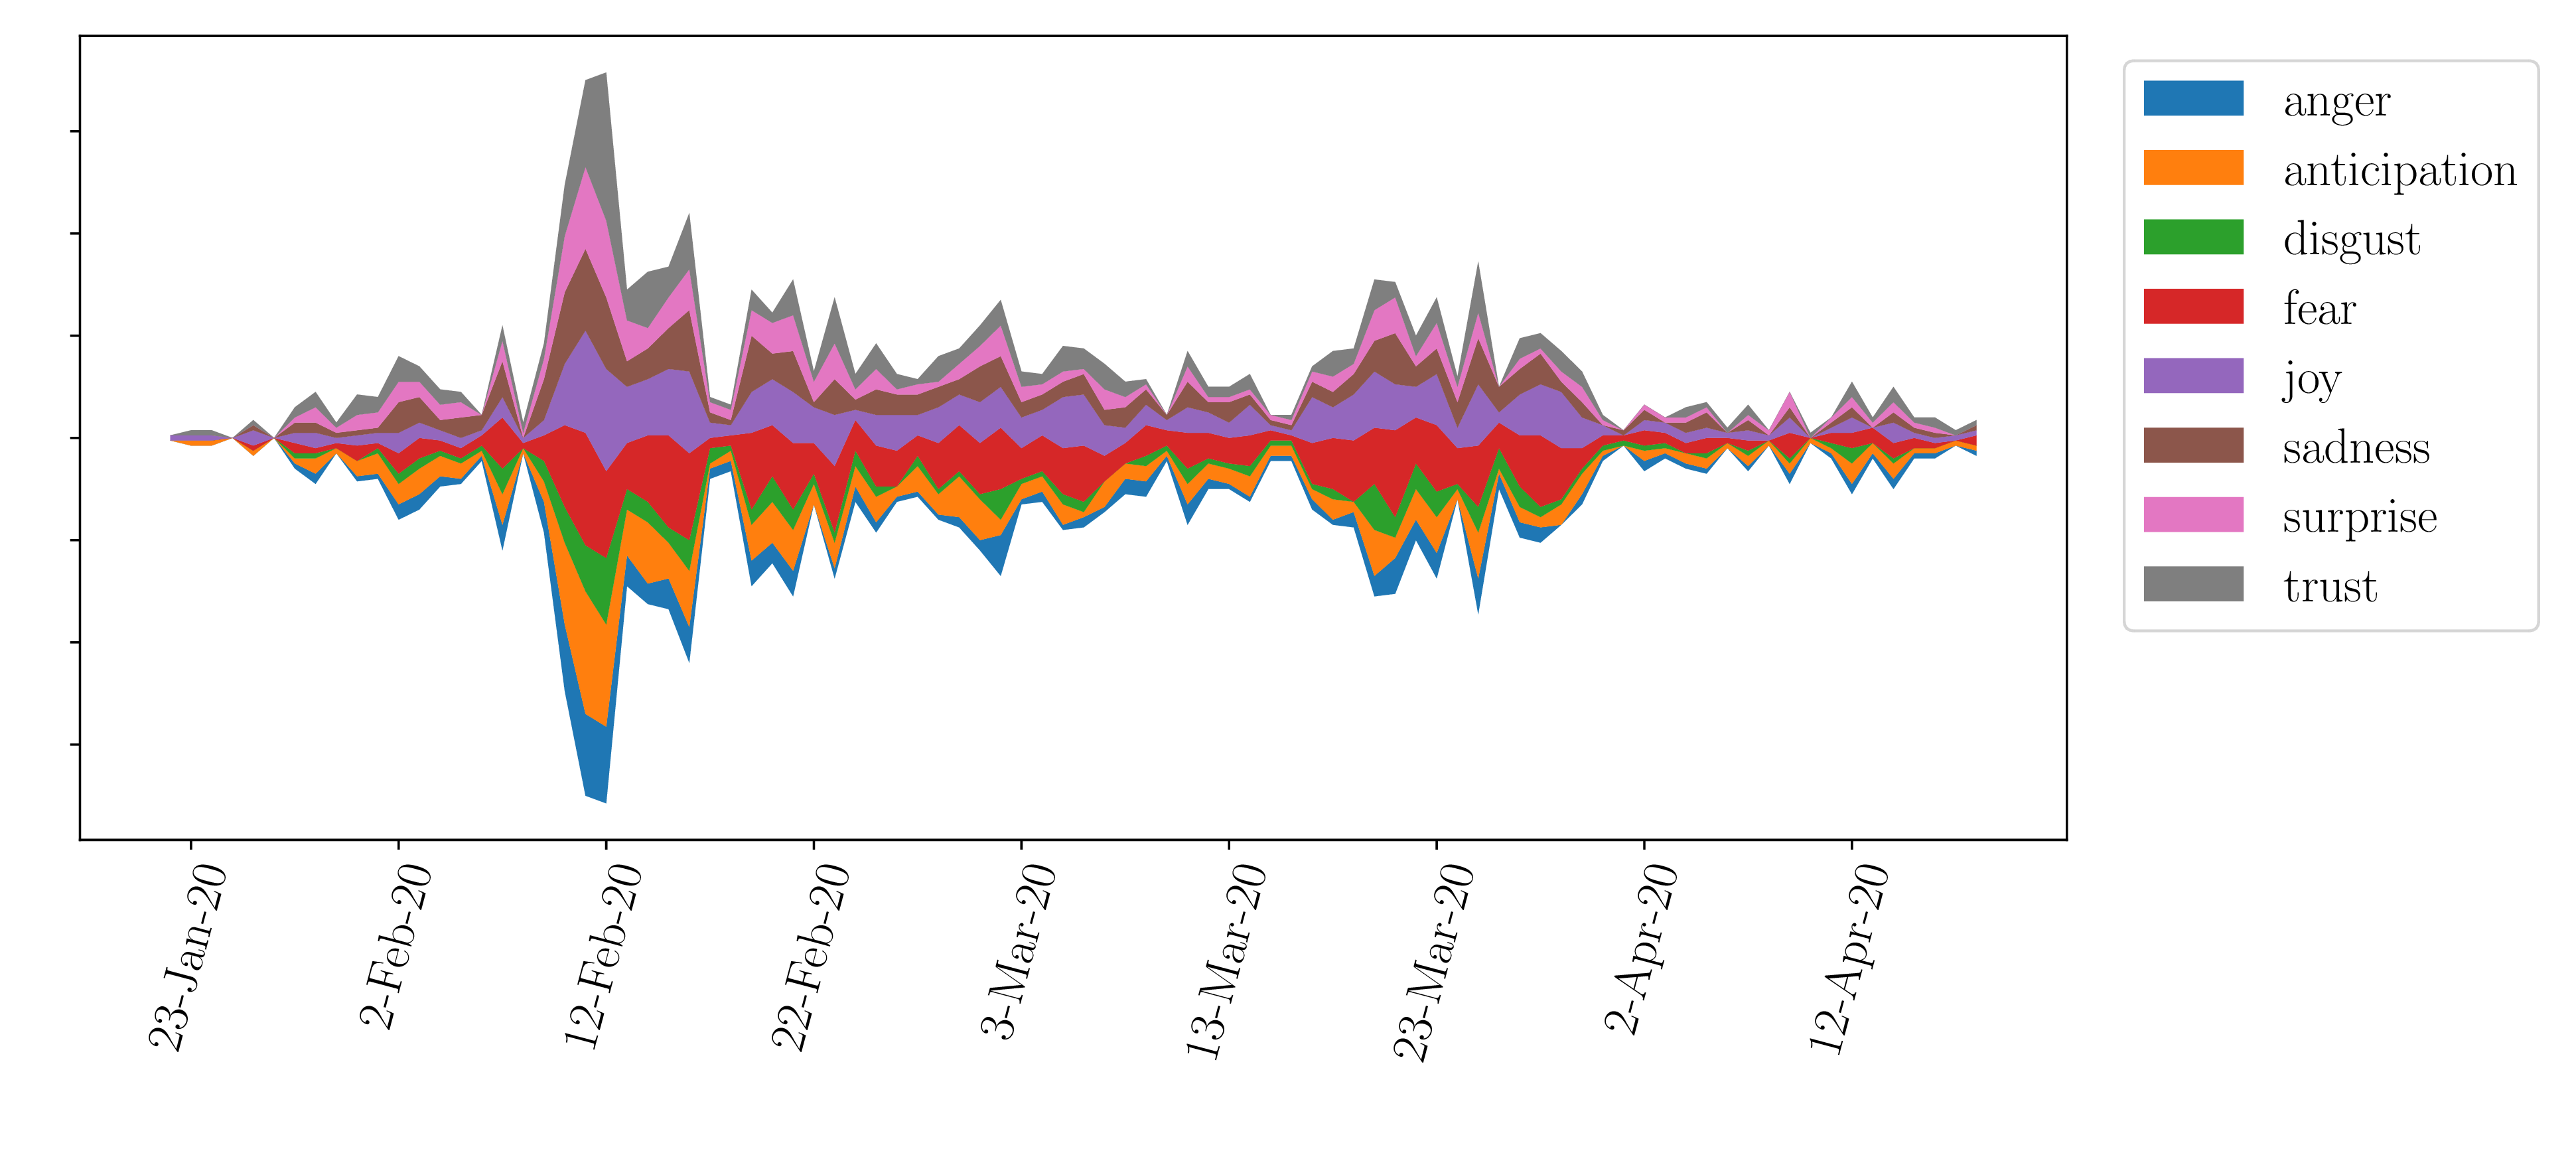
**

**Figure 16S.** Changes in the prevalence of NRC emotions in the theme “quarantine boomers” within “jokes/ridicule” tweets related to older adults and COVID-19 from January 23rd to May 20th, 2020

**
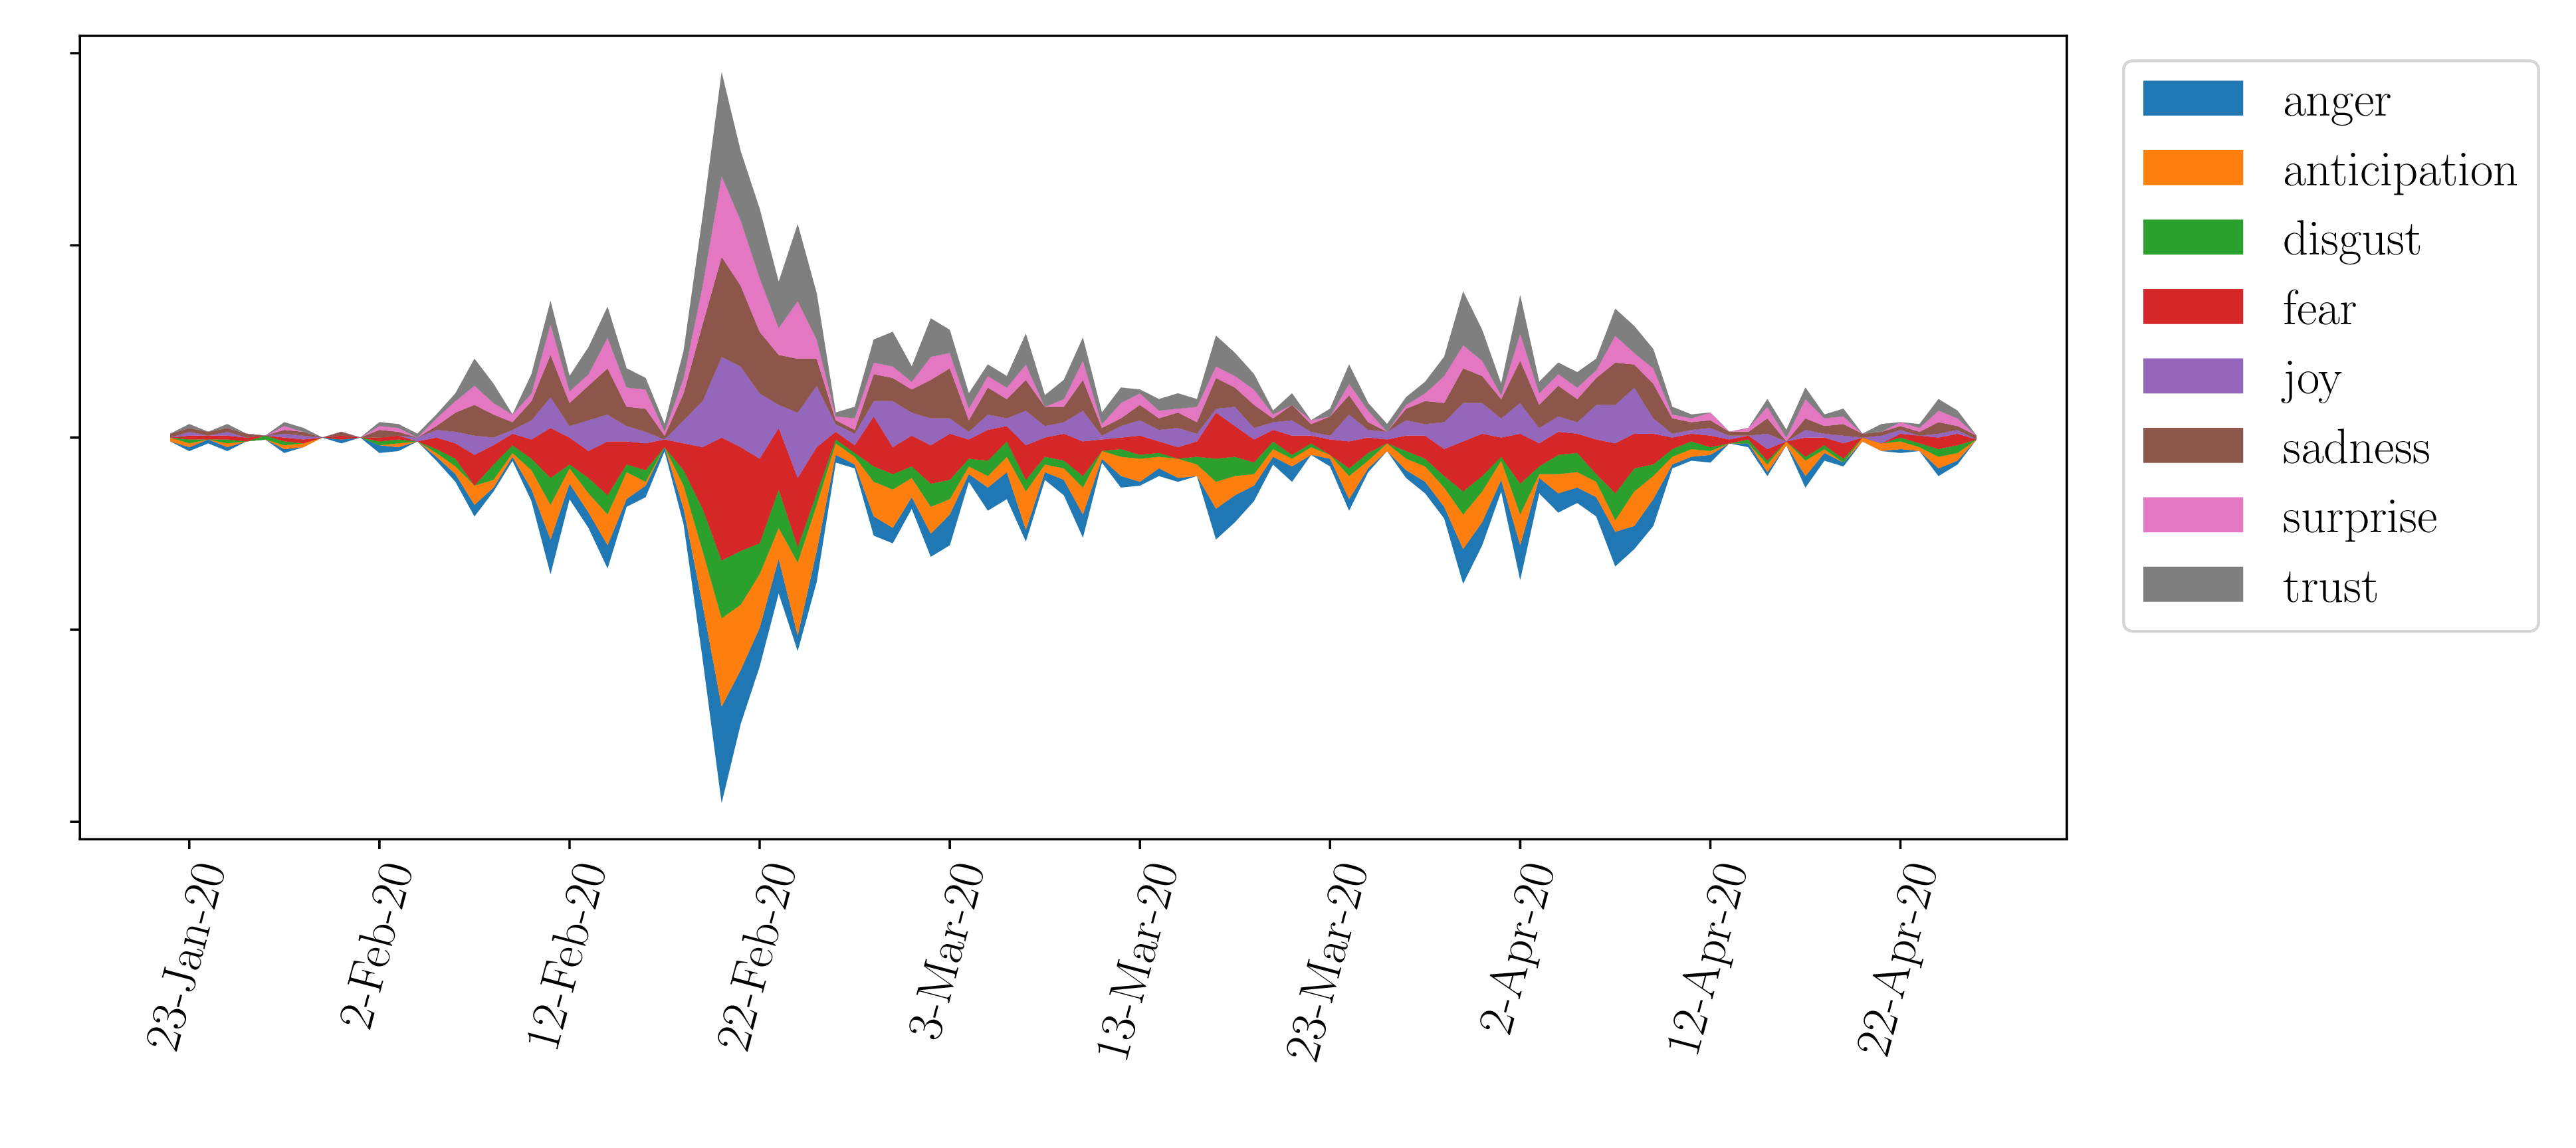
**

**Figure 17S.** Changes in the prevalence of NRC emotions in the theme “aging stereotypes” within “jokes/ridicule” tweets related to older adults and COVID-19 from January 23rd to May 20th, 2020

**
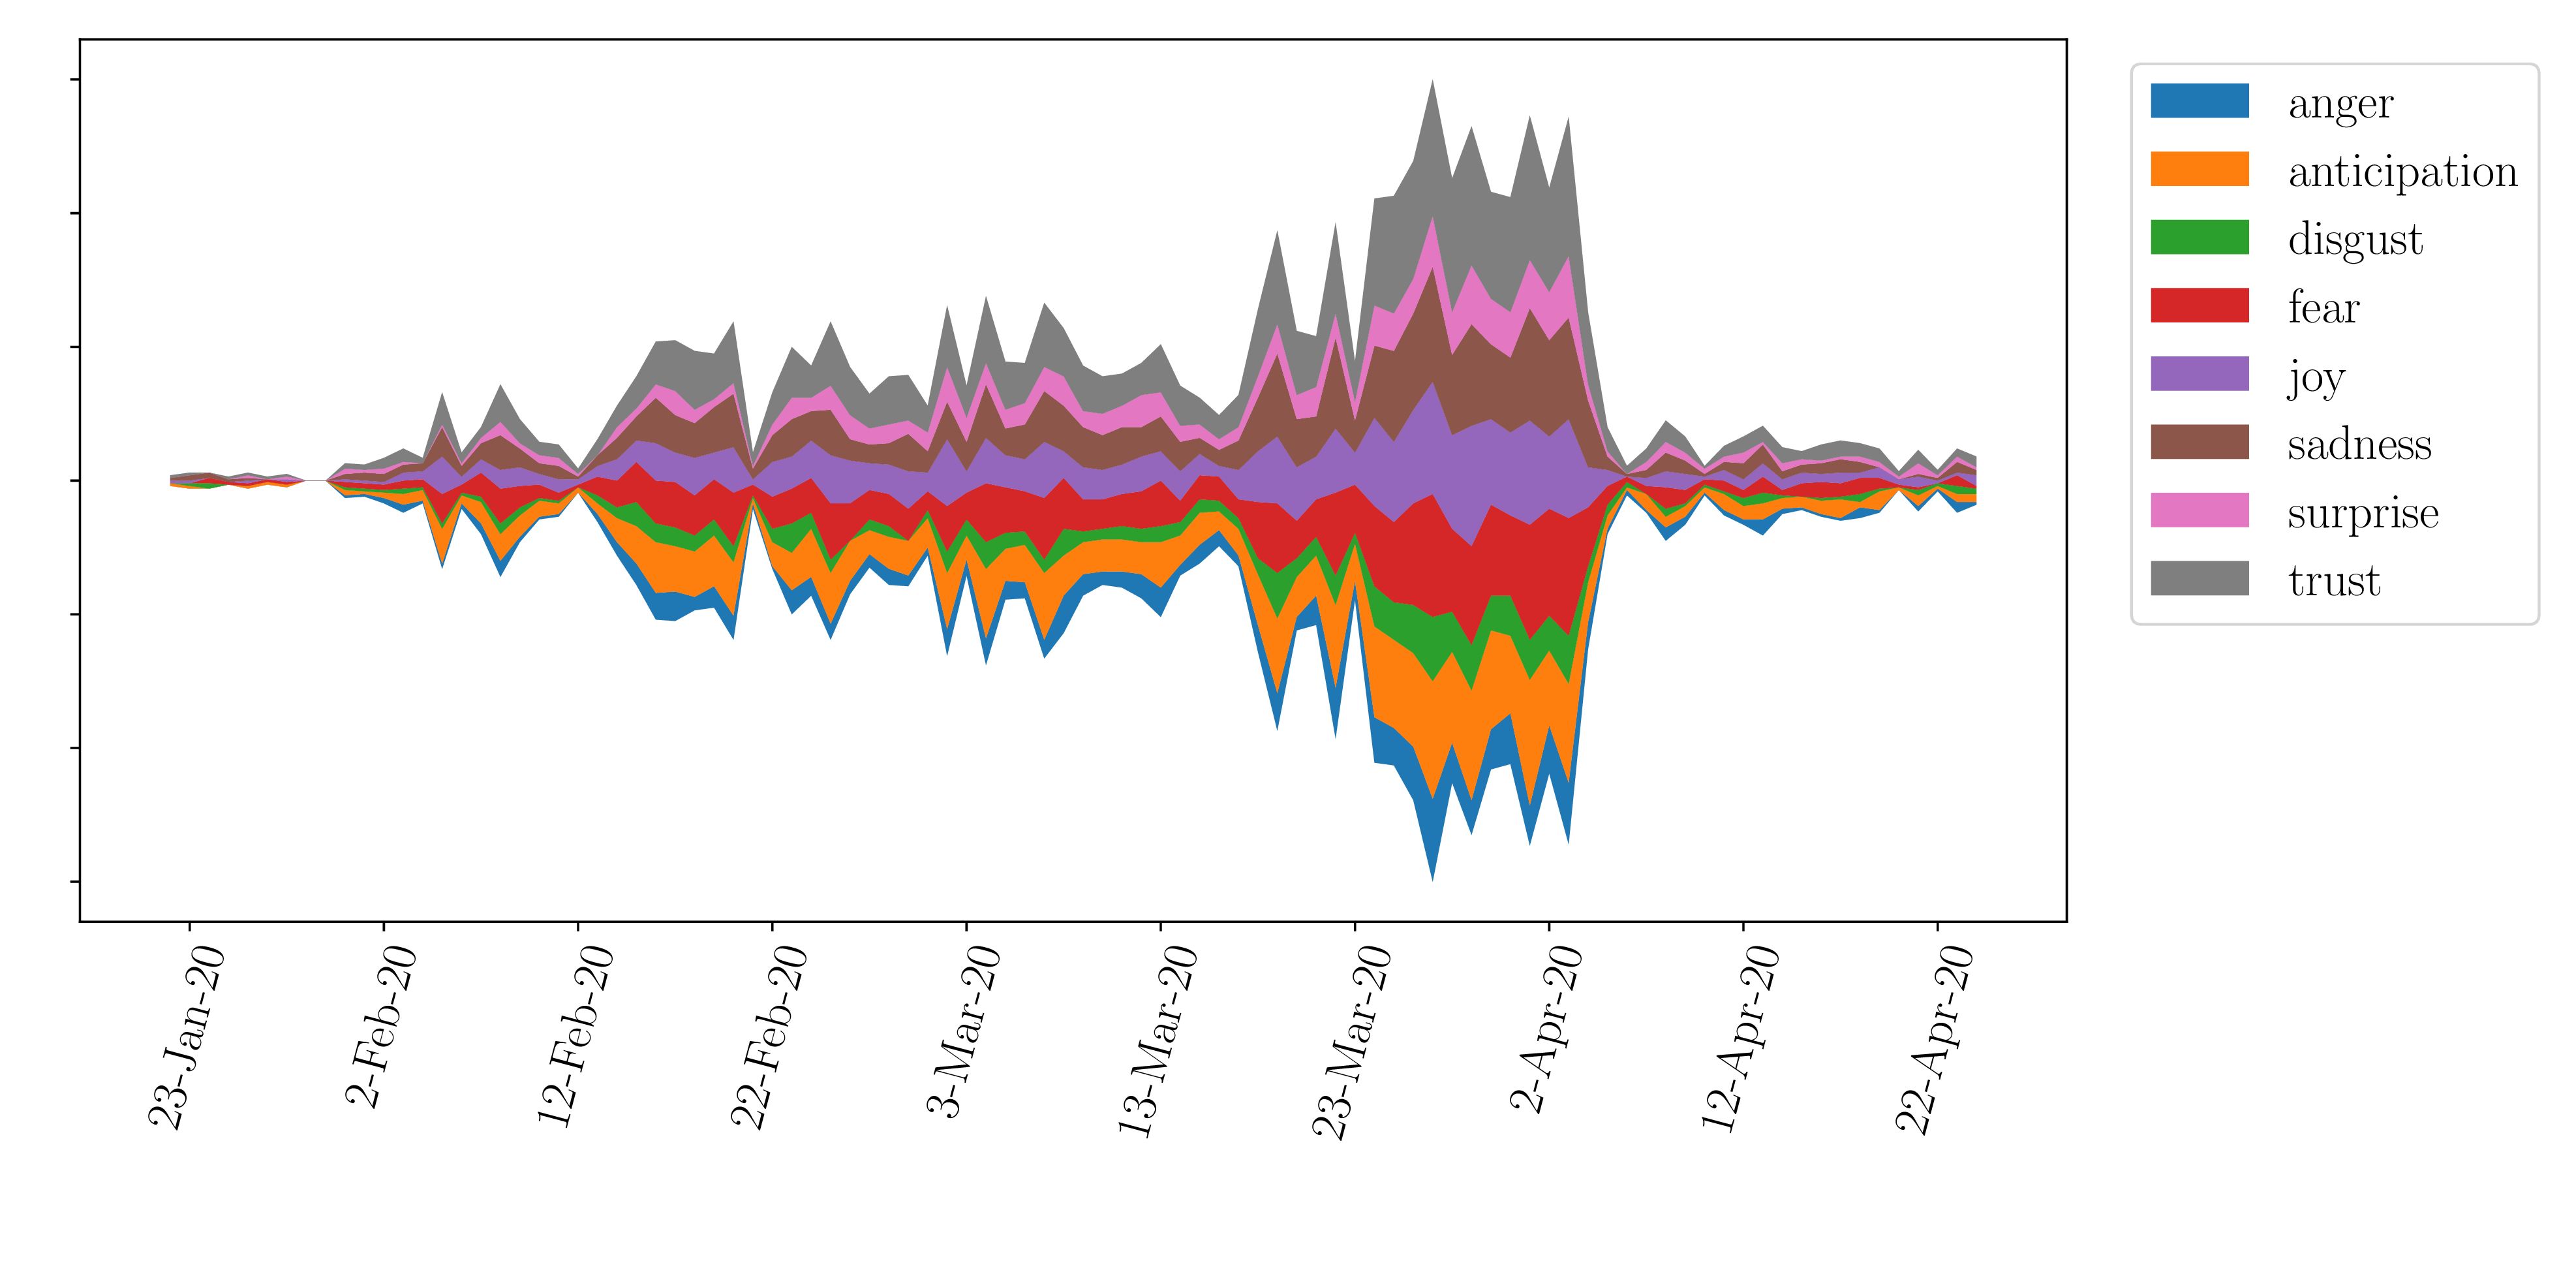
**

**Figure 18S.** Changes in the prevalence of NRC emotions in the theme “family and friends” within “personal experiences” tweets related to older adults and COVID-19 from January 23rd to May 20th, 2020

**
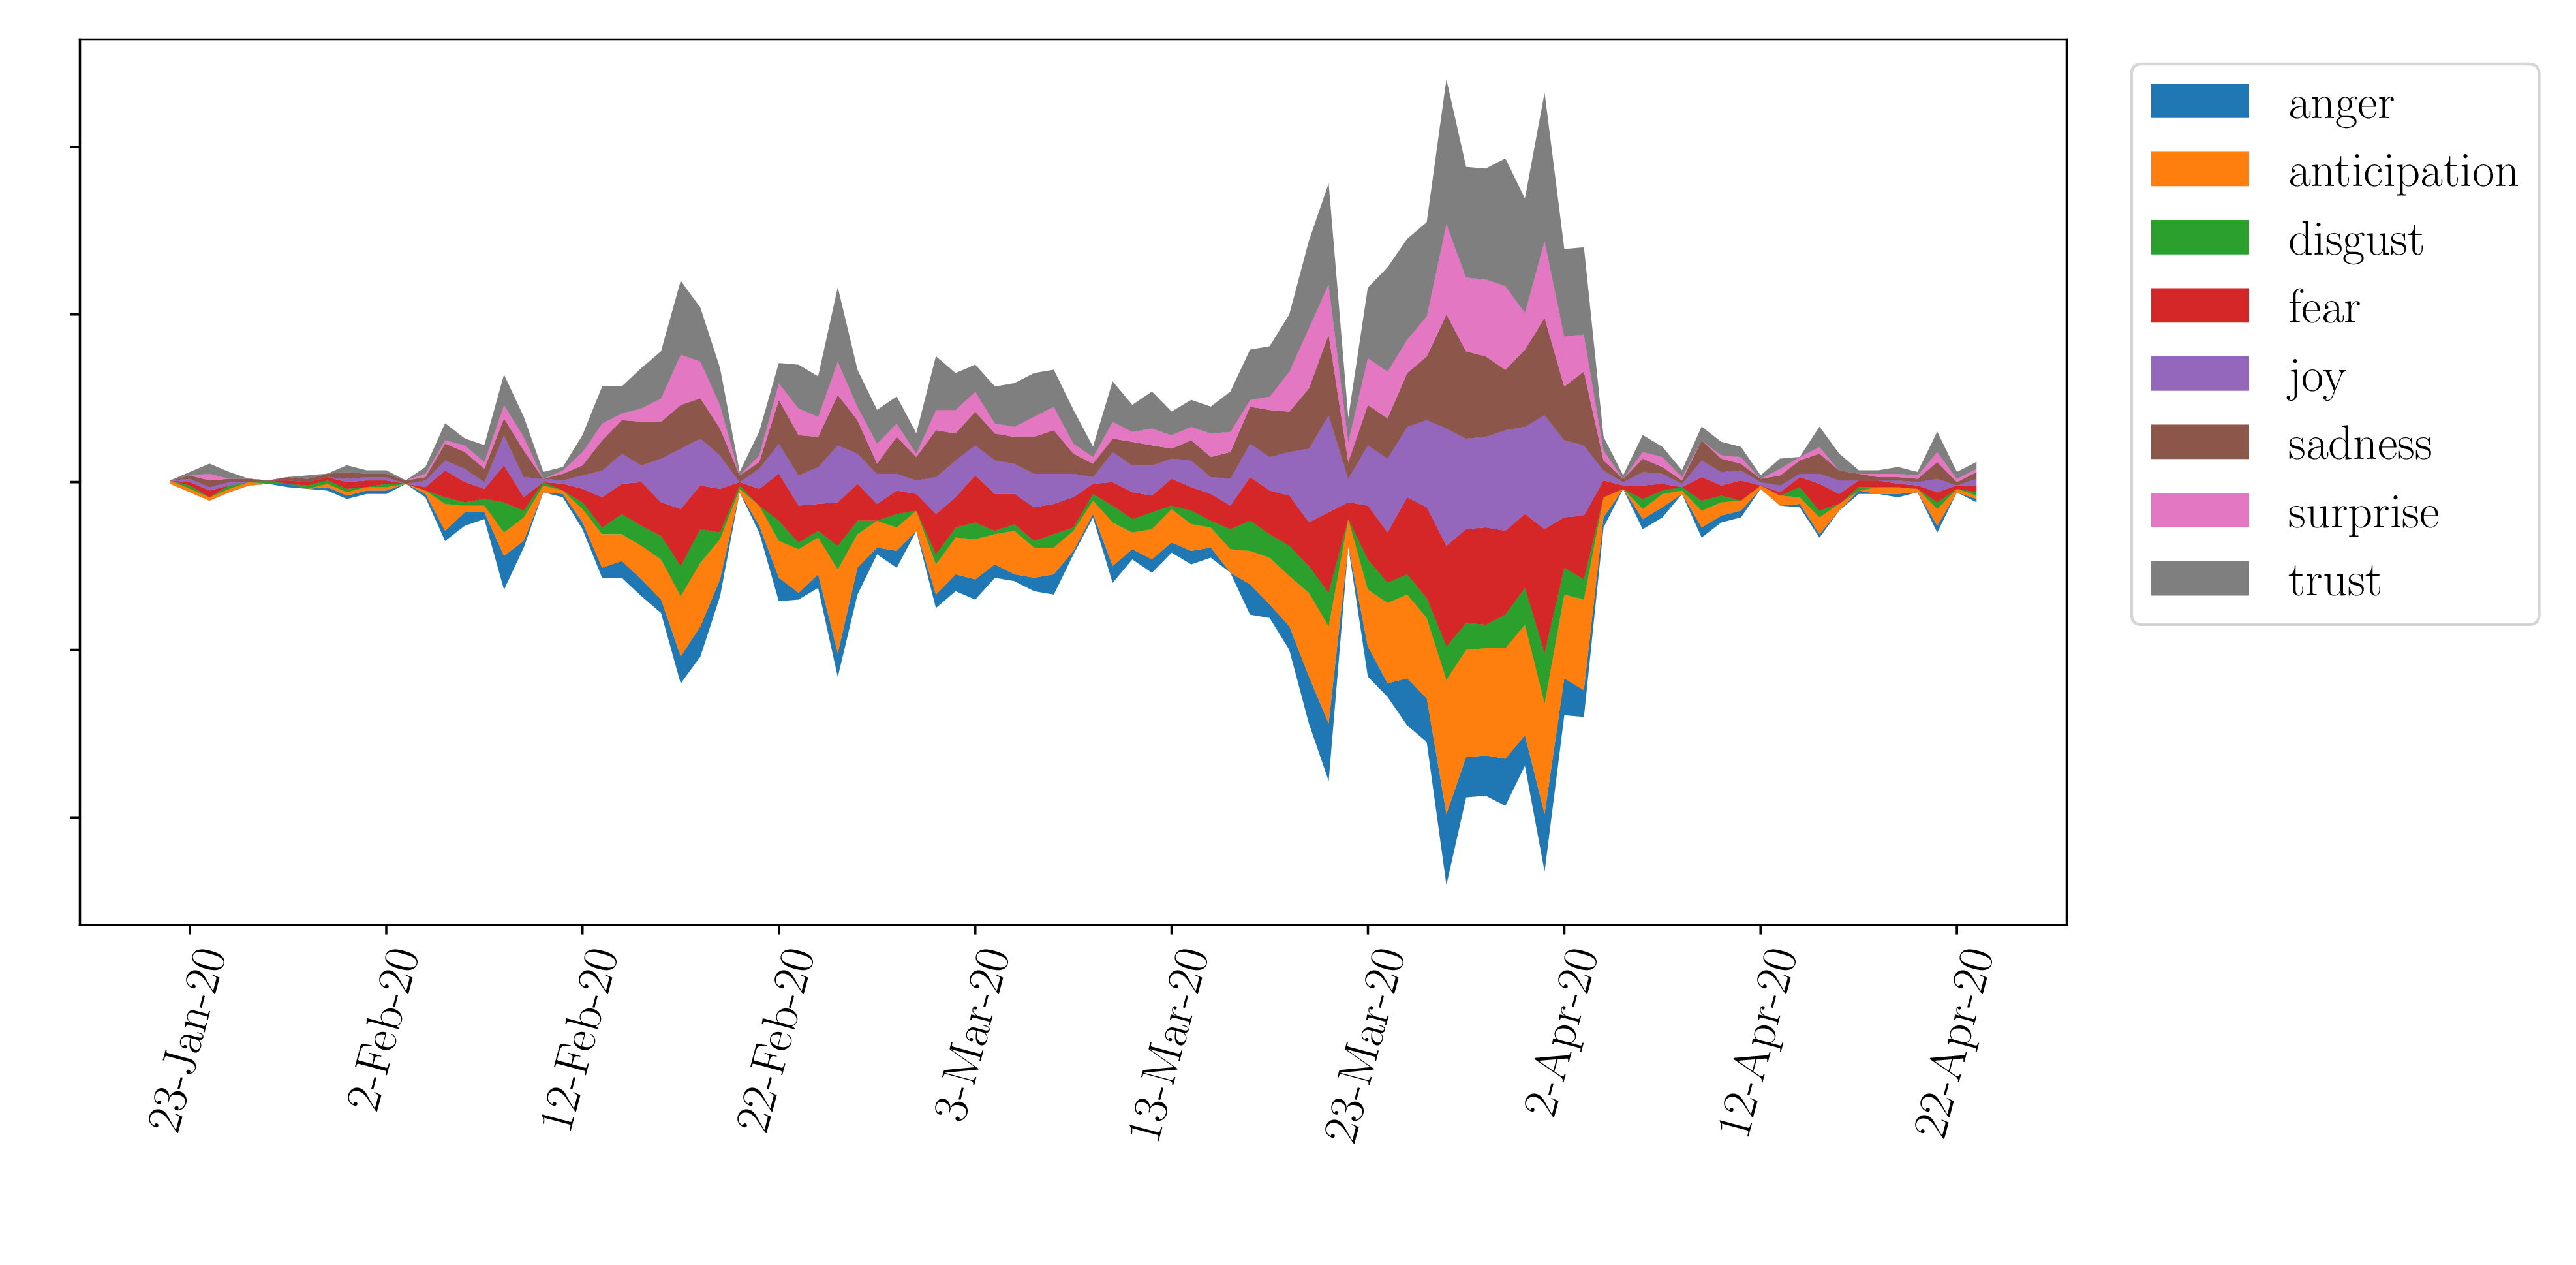
Figure 19S.** Changes in the prevalence of NRC emotions in the theme “neighbors” within “personal experiences” tweets related to older adults and COVID-19 from January 23rd to May 20th, 2020
